# Supplementary material for: Cu(ii)-catalyzed domino reaction of 2H-azirines with diazotetramic and diazotetronic acids. Synthesis of 2-substituted 2H-1,2,3-triazoles
Source: Royal Society of Chemistry journal article supplement (doi:10.1039/c3ob40708j), 2013-01-01
Supplement: c3ob40708j.pdf [file c3ob40708j.pdf]

## Supplementary Information

### Cu(II)-Catalyzed Domino Reaction of 2*H*-Azirines with Diazotetramic and Diazotetronic Acids. Synthesis of 2-Substituted 2*H*-1,2,3-Triazoles

Nikolai V. Rostovskii,<sup>a</sup> Mikhail S. Novikov,<sup>a,\*</sup> Alexander F. Khlebnikov,<sup>a</sup> Sergei M. Korneev,<sup>a</sup>  
Dmitry S. Yufit<sup>b</sup>

<sup>a</sup> Department of Chemistry, Saint-Petersburg State University, Universitetskii pr. 26, 198504 St. Petersburg, Russia

<sup>b</sup> Department of Chemistry, Durham University, Durham, South Rd., DH1 3LE, UK.

\* Corresponding author. Fax: +7 812-428-6939; Tel: +7 812-428-4021; E-mail: [m.s.novikov@chem.spbu.ru](mailto:m.s.novikov@chem.spbu.ru)

#### List of the Contents

|                                                                                                       |      |
|-------------------------------------------------------------------------------------------------------|------|
| General experimental details .....                                                                    | 2    |
| Synthesis of 3-diazopyrrolidine-2,4-dione (1a) .....                                                  | 2    |
| Synthesis of 1-acetyl-3-diazopyrrolidine-2,4-dione (1b) .....                                         | 2    |
| <i>tert</i> -Butyl 3-diazo-2,4-dioxopyrrolidine-1-carboxylate (1c) .....                              | 4    |
| Synthesis of 1-acetyl-4-hydroxy-3-(4-methoxyphenyl)-1 <i>H</i> -pyrrole-2(5 <i>H</i> )-one (11) ..... | 4    |
| <sup>1</sup> H and <sup>13</sup> C NMR spectra of compounds 3, 4, 6, 7 and 12 .....                   | 6–49 |
| References .....                                                                                      | 49   |

## General experimental details

Melting points were determined on a hot stage microscope and are uncorrected.  $^1\text{H}$  (300 MHz),  $^{13}\text{C}$  (75 MHz) NMR spectra were measured in  $\text{CDCl}_3$  or  $\text{DMSO-d}_6$  on a Bruker DPX 300 spectrometer and  $^1\text{H}$  (400 MHz),  $^{13}\text{C}$  (100 MHz) NMR spectra were measured in  $\text{CDCl}_3$  or  $\text{DMSO-d}_6$  on a Bruker Avance-400 spectrometer. Chemical shifts ( $\delta$ ) are reported in ppm downfield from tetramethylsilane. Electrospray ionization mass spectra were measured on a Bruker micrOTOF mass spectrometer. Elemental analysis was performed on a Hewlett-Packard 185B CHN-analyser. IR spectra were recorded on a Bruker TENSOR 27 spectrometer for tablets in KBr. Thin-layer chromatography (TLC) was conducted on aluminium sheets precoated with  $\text{SiO}_2$  ALUGRAM SIL G/UV<sub>254</sub>. Methyl 2,4-dioxopyrrolidine-3-carboxylate was synthesized according to the published procedure.<sup>1</sup>

### Synthesis of 3-diazopyrrolidine-2,4-dione (1a)

To a solution, obtained after heating under reflux of a suspension of methyl 2,4-dioxopyrrolidine-3-carboxylate (3.25 g, 20.7 mmol) in anhydrous acetonitrile (1.6 L) for 2 h, a solution of 4-acetamidobenzenesulfonyl azide (5.46 g, 27.7 mmol) in anhydrous acetonitrile (100 mL) and a solution of triethylamine (2.5 g, 24.8 mmol) in anhydrous acetonitrile (50 mL) were added at 0 °C under stirring. The mixture was stirred at 0 °C for 15 min and then at rt for 4 h. The solvent was removed under vacuum, and the orange solid was subjected to sublimation (150–160 °C/0.1–0.5 torr) for 1.5 h to give 1.47 g (57%) of 3-diazopyrrolidine-2,4-dione as a light yellow solid.  $\delta_{\text{H}}$  (300 MHz;  $\text{CDCl}_3$ ;  $\text{Me}_4\text{Si}$ ) 3.96 (2 H, s,  $\text{CH}_2$ ), 5.92 (1 H, br. s, NH).

### Synthesis of 1-acetyl-3-diazopyrrolidine-2,4-dione (1b)

To a solution of 3-diazopyrrolidine-2,4-dione (623 mg, 5 mmol) and acetic anhydride (815 mg, 8 mmol) in anhydrous dichloromethane (20 mL) a solution of 4-(*N,N*-dimethylamino)pyridine (305 mg, 2.5 mmol) in anhydrous dichloromethane (3 mL) was added dropwise at rt in 5 min. The mixture was stirred at rt for additional 2 h, washed with 0.5 N HCl solution (2×20 mL) and dried with  $\text{MgSO}_4$ . The removal of volatile components under vacuum and washing of the obtained solid with  $\text{Et}_2\text{O}$  gave 575 mg (69%) of 1-acetyl-3-diazopyrrolidine-2,4-dione as a beige solid. Recrystallization of the solid from  $\text{Et}_2\text{O}$  produces colorless prisms. Mp 115–116 °C. Found C, 43.34; H, 2.81; N, 25.15.  $\text{C}_6\text{H}_5\text{N}_3\text{O}_3$  requires C, 43.12; H, 3.02; N 25.14.  $\nu_{\text{max}}$  (KBr)/ $\text{cm}^{-1}$  2939, 2152 (C=N), 1691 (C=O).  $\delta_{\text{H}}$  (300 MHz;  $\text{CDCl}_3$ ;  $\text{Me}_4\text{Si}$ ) 2.60 (s, 3 H,  $\text{CH}_3$ ), 4.25 (s, 2 H,  $\text{CH}_2$ ).  $\delta_{\text{C}}$  (75 MHz;  $\text{CDCl}_3$ ;  $\text{Me}_4\text{Si}$ ) 25.1 ( $\text{CH}_3$ ), 52.9 ( $\text{CH}_2$ ), 68.6 (C=N), 161.5 (C=O), 168.9 (C=O), 182.4 (C=O).

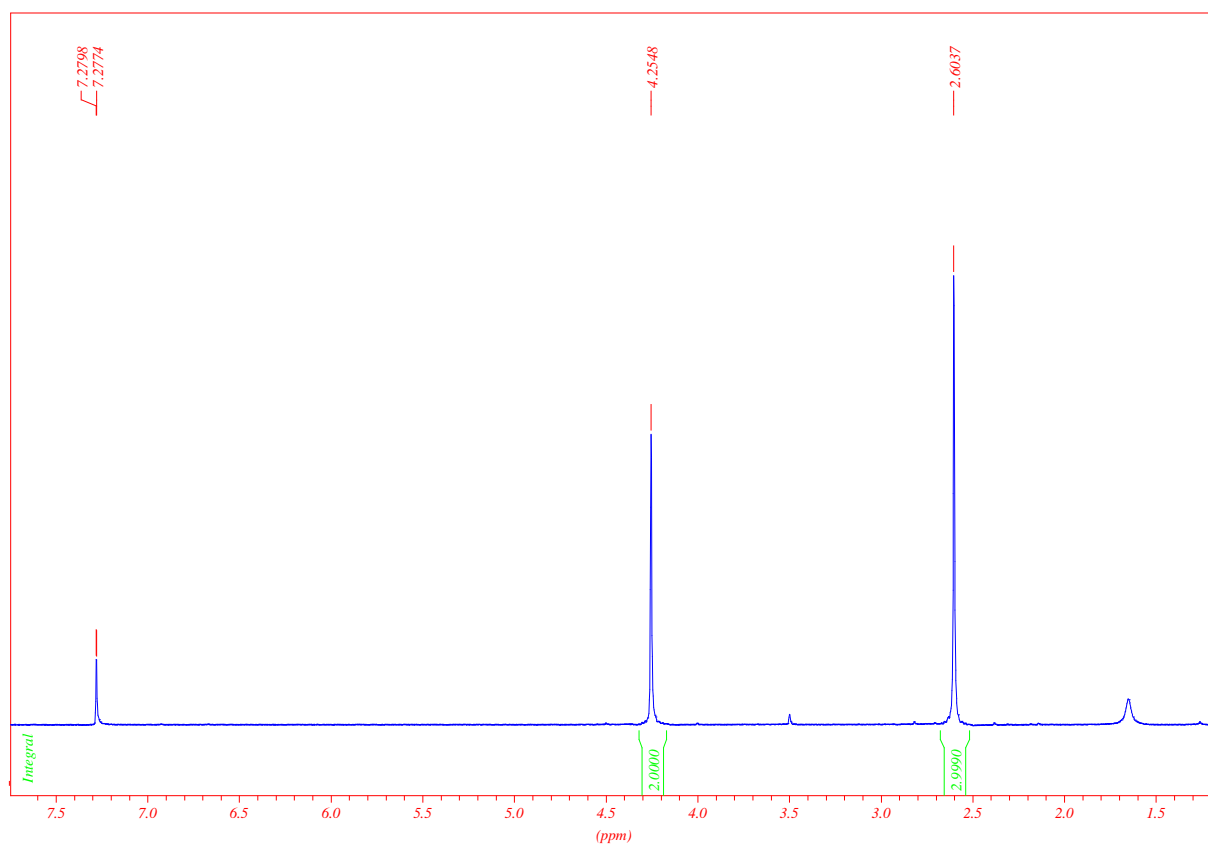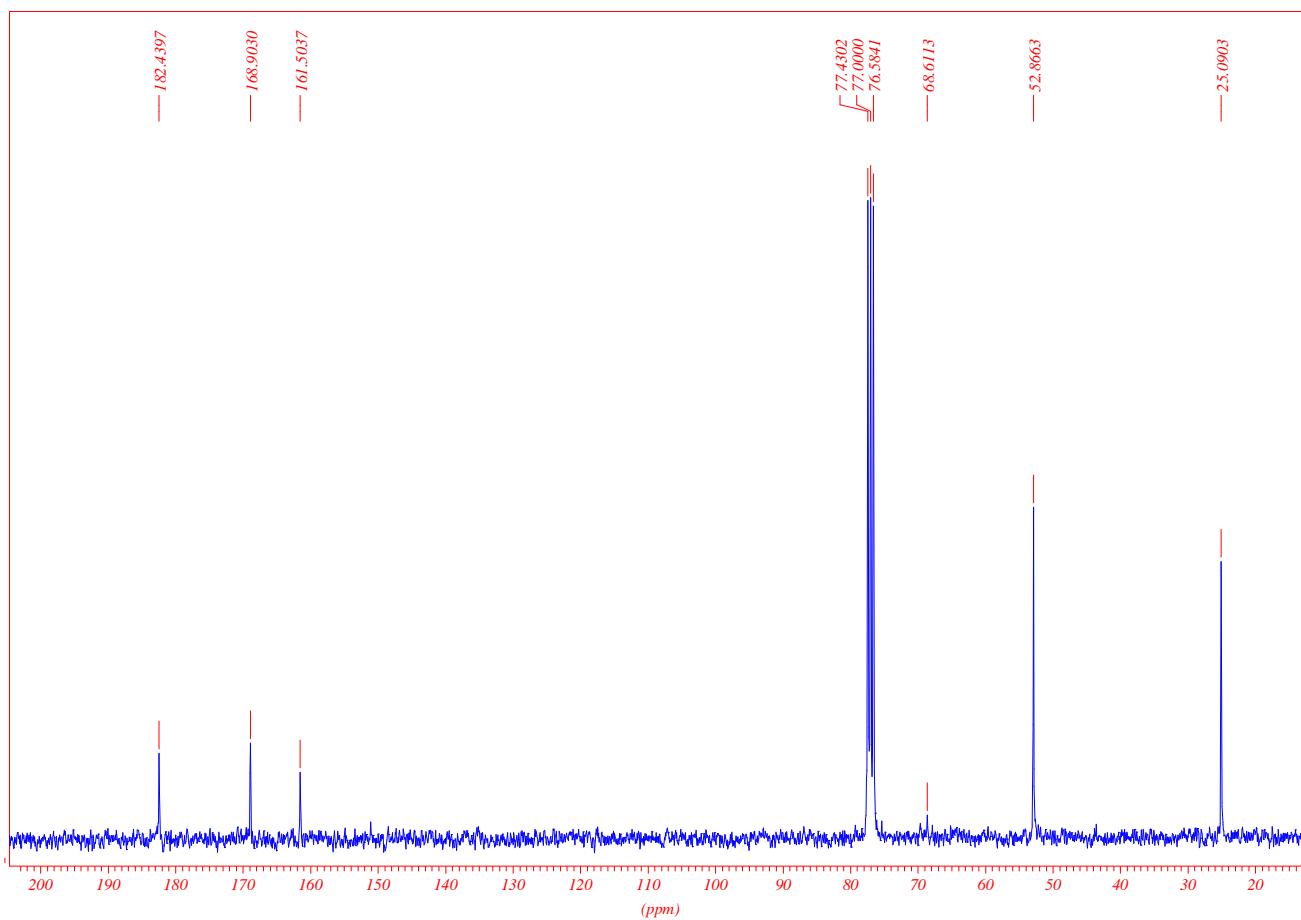

**tert-Butyl 3-diazo-2,4-dioxopyrrolidine-1-carboxylate (1c)** was prepared according to published procedure in 52% yield.<sup>2</sup>  $\delta_{\text{H}}$  (300 MHz;  $\text{CDCl}_3$ ;  $\text{Me}_4\text{Si}$ ) 1.53 (9 H, s,  $\text{CH}_3$ ), 4.16 (2 H, s,  $\text{CH}_2$ ).  $\delta_{\text{C}}$  (75 MHz;  $\text{CDCl}_3$ ;  $\text{Me}_4\text{Si}$ ) 27.9 ( $\text{CH}_3$ ), 53.7 ( $\text{CH}_2$ ), 68.5 ( $\text{C}=\text{N}$ ), 84.2 ( $\text{C}-(\text{CH}_3)_3$ ), 148.3 ( $\text{C}=\text{O}$ ), 160.0 ( $\text{C}=\text{O}$ ), 182.7 ( $\text{C}=\text{O}$ ).

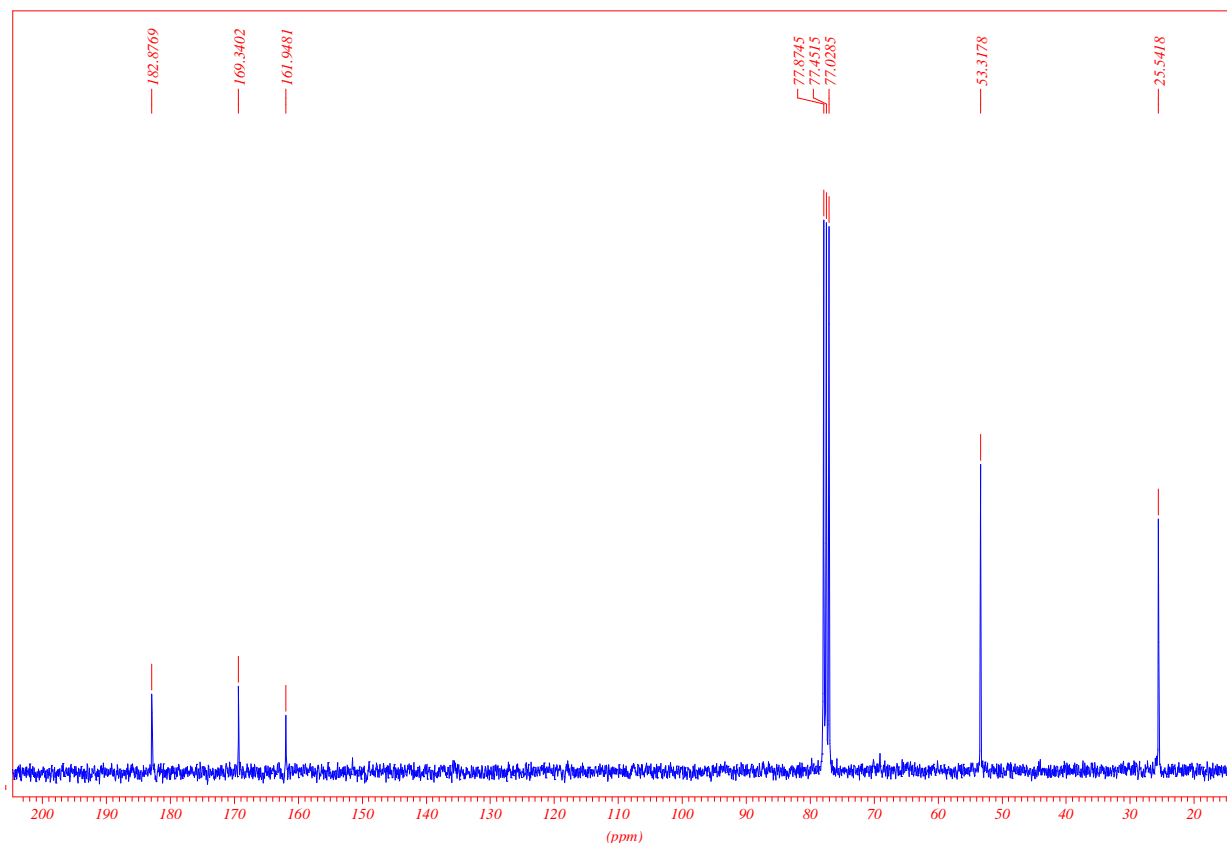

### Synthesis of 1-acetyl-4-hydroxy-3-(4-methoxyphenyl)-1H-pyrrole-2(5H)-one (11)

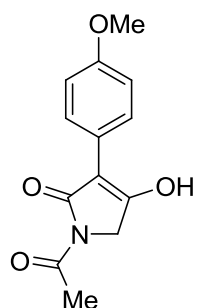

A solution of 1-acetyl-3-diazopyrrolidine-2,4-dione (116 mg, 0.69 mmol) and  $\text{Rh}_2(\text{OAc})_4$  (3 mg, 0.01 mmol) in anisole (14 mL) was heated at 120 °C under stirring for 30 min. Anisole was removed under vacuum and crystallization of the residue from  $\text{Et}_2\text{O}$  gave 140 mg (82%) of 1-acetyl-4-hydroxy-3-(4-methoxyphenyl)-1H-pyrrole-2(5H)-one **11** as a beige solid. Mp 153–203 °C (dec.).  $\nu_{\text{max}}$  (KBr)/ $\text{cm}^{-1}$  2993, 2938, 2630, 1734 ( $\text{C}=\text{O}$ ), 1605 ( $\text{C}=\text{O}$ ), 1516, 1398, 1356, 1312, 1292, 1250, 1185, 1157, 1034, 984, 847.  $\delta_{\text{H}}$  (300 MHz; acetone- $d_6$ ;  $\text{Me}_4\text{Si}$ ) 2.48 (3 H, s,  $\text{CH}_3$ ), 3.81 (3 H, s,  $\text{CH}_3$ ), 4.31 (2 H, s,  $\text{CH}_2$ ), 6.95 (2 H, d,  $J$  8.7 Hz, ArH), 7.92 (2 H, d,  $J$  8.7 Hz, ArH).  $\delta_{\text{C}}$  (75 MHz; acetone- $d_6$ ;  $\text{Me}_4\text{Si}$ ) 24.8 ( $\text{CH}_3$ ), 47.5 ( $\text{CH}_2$ ), 55.5 ( $\text{CH}_3$ ), 105.9, 114.1, 124.2, 129.8, 159.3, 168.6, 169.4, 170.5. HRMS (ESI) [ $\text{M} + \text{Na}^+$ ] calcd. for  $\text{C}_{13}\text{H}_{13}\text{NO}_4\text{Na}$  270.0737, found 270.0741.

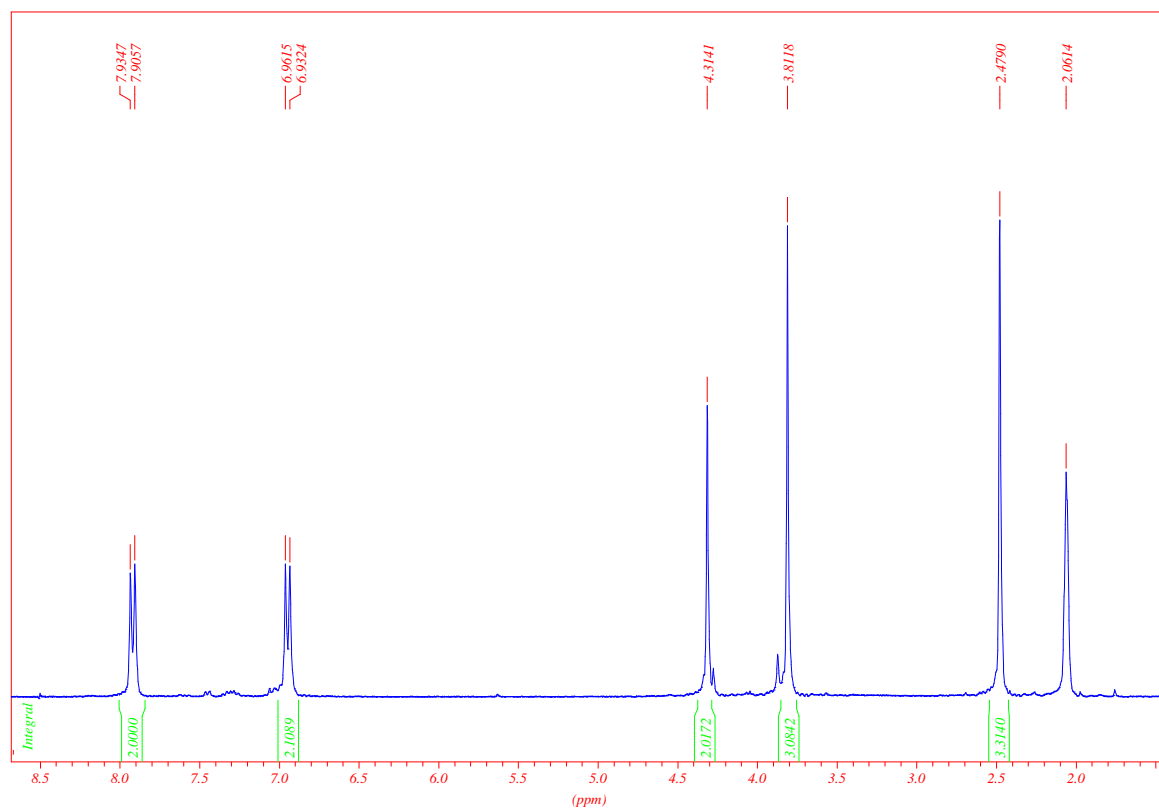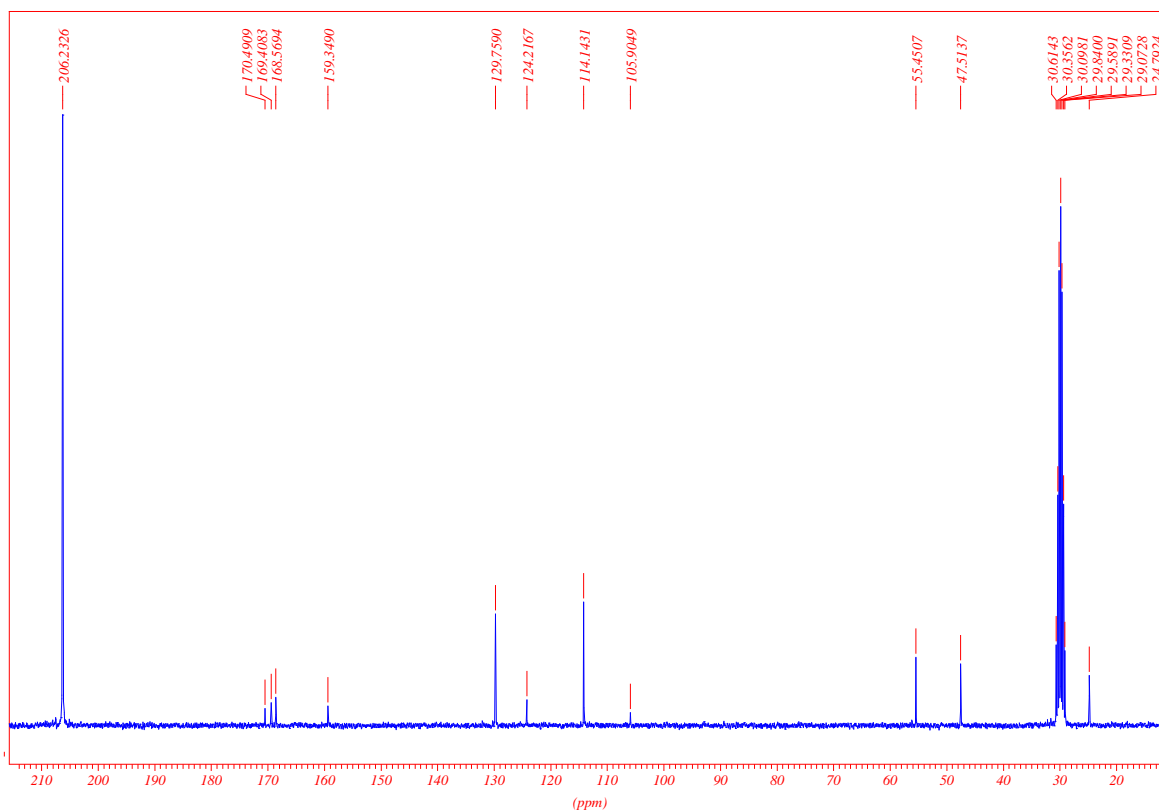

## $^1\text{H}$ and $^{13}\text{C}$ NMR spectra of compounds 3, 4, 6, 7 and 12

(3*aRS*,6*aRS*)-6*a*-Hydroxy-2-(4-methylphenyl)-3*a*-[4-(4-methylphenyl)-2*H*-1,2,3-triazol-2-yl]-3*a*,5,6,6*a*-tetrahydropyrrolo[3,4-*b*]pyrrole-4(3*H*)-one (3*a*).

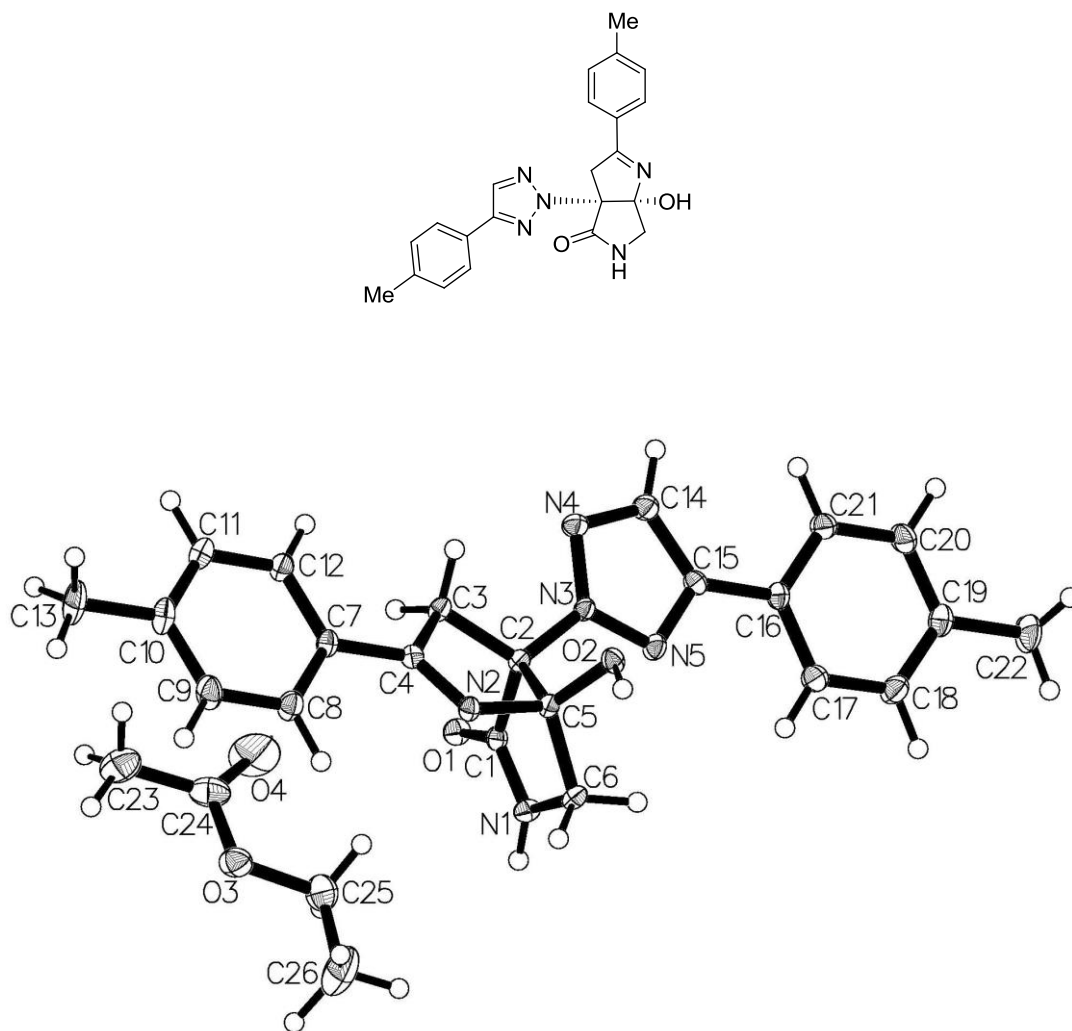

**Fig. 1** X-ray structure of the solvate **3a**·EtOAc.

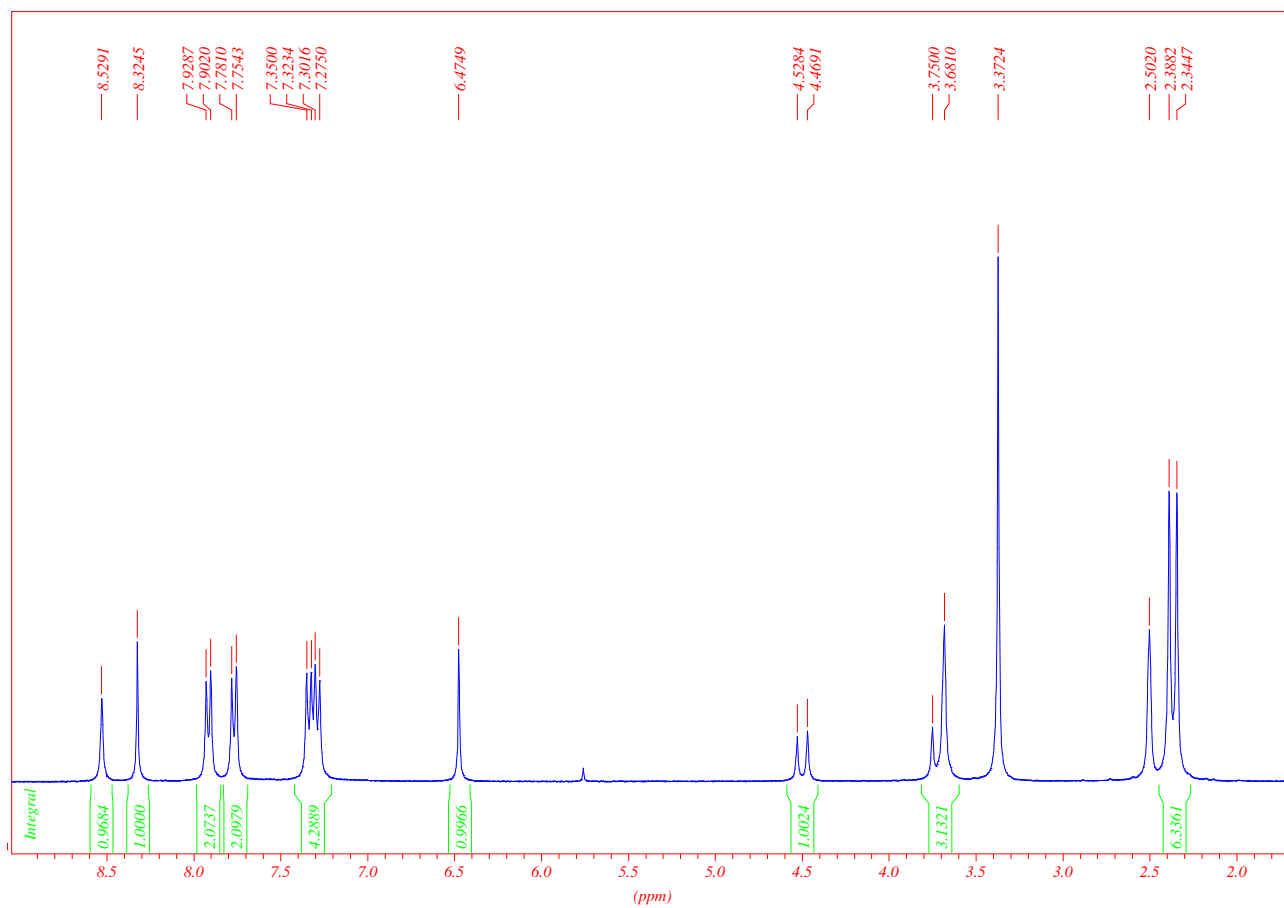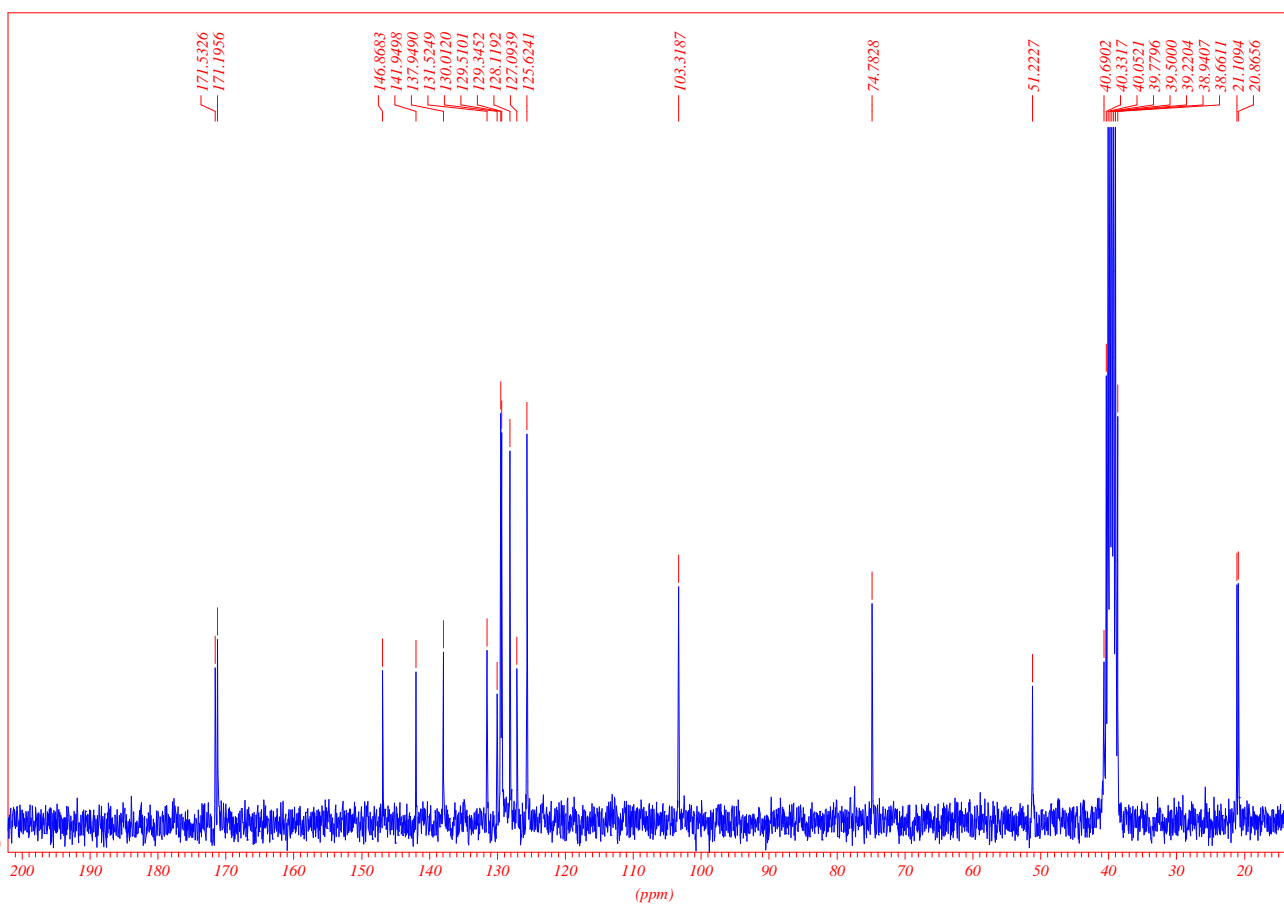

**(5*RS*,9*RS*)-3-(4-Methylphenyl)-9-[4-(4-methylphenyl)-2*H*-1,2,3-triazol-2-yl]-1-oxa-4,7-diazaspiro[4.4]non-3-en-8-one (4a)**

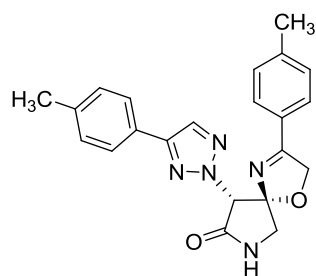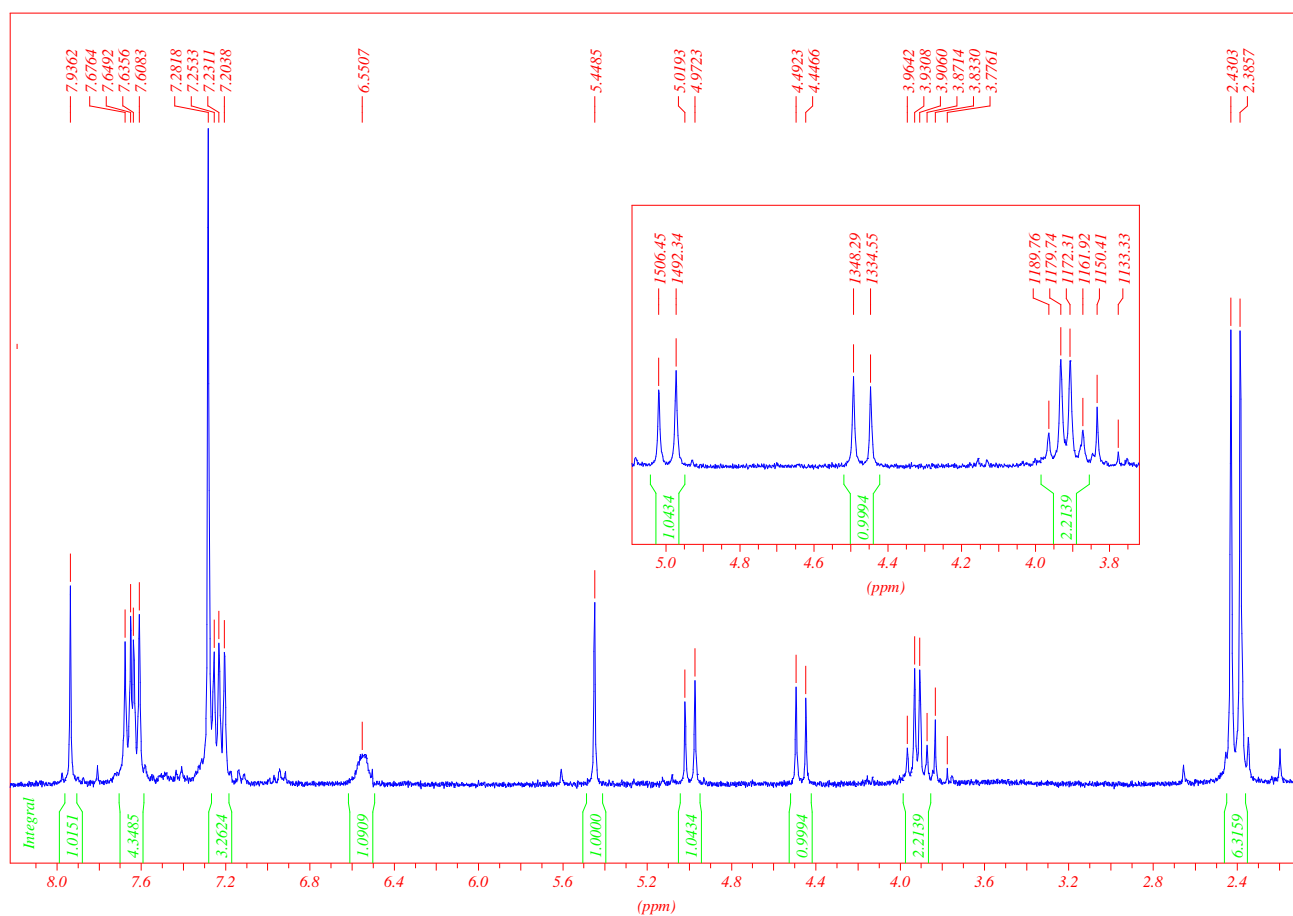



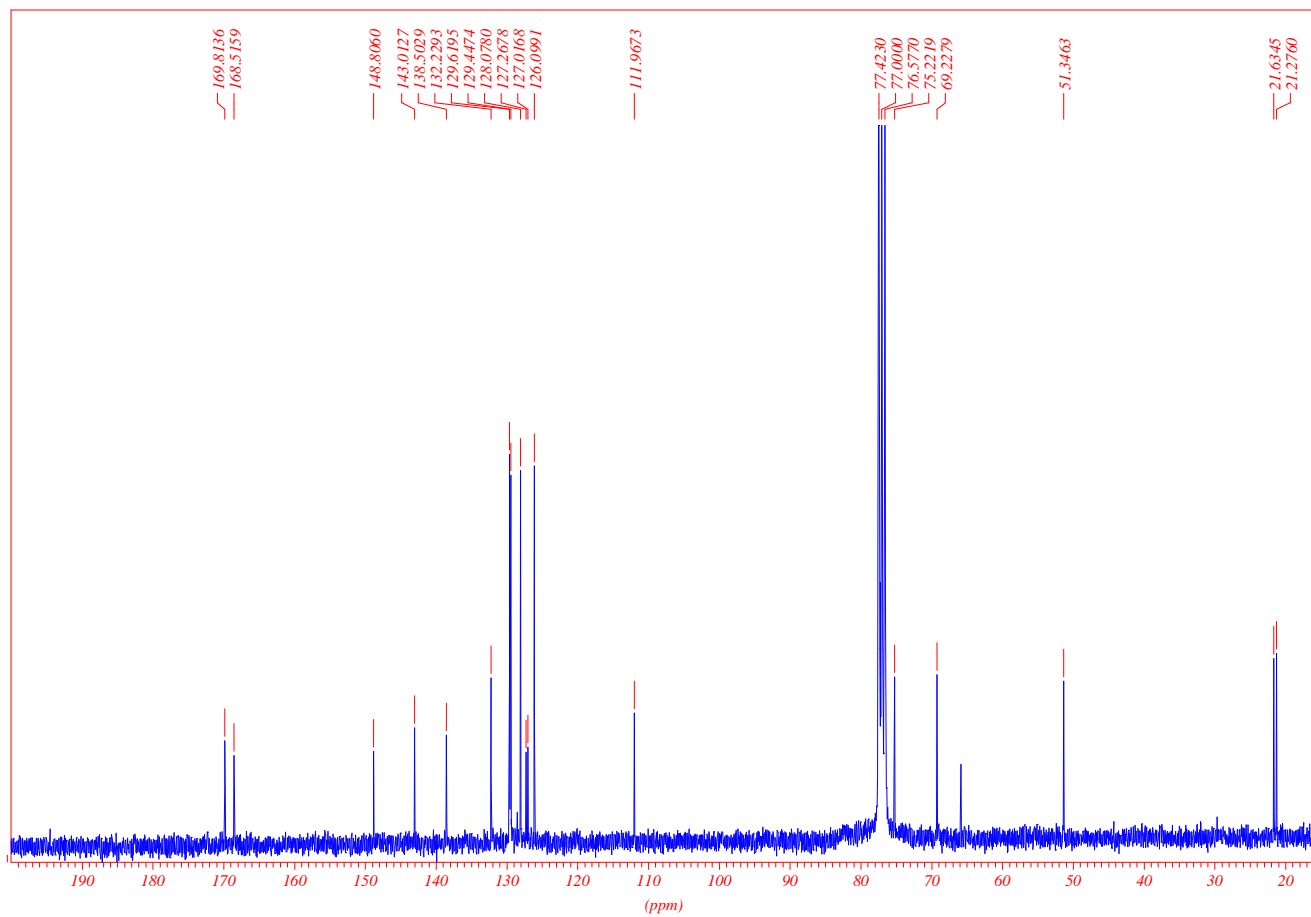

**3-(4-Methylphenyl)-9-[4-(4-methylphenyl)-2*H*-1,2,3-triazol-2-yl]-1-oxa-4,7-diazaspiro[4.4]non-3-en-8-one (4a) (diastereomeric mixture)**

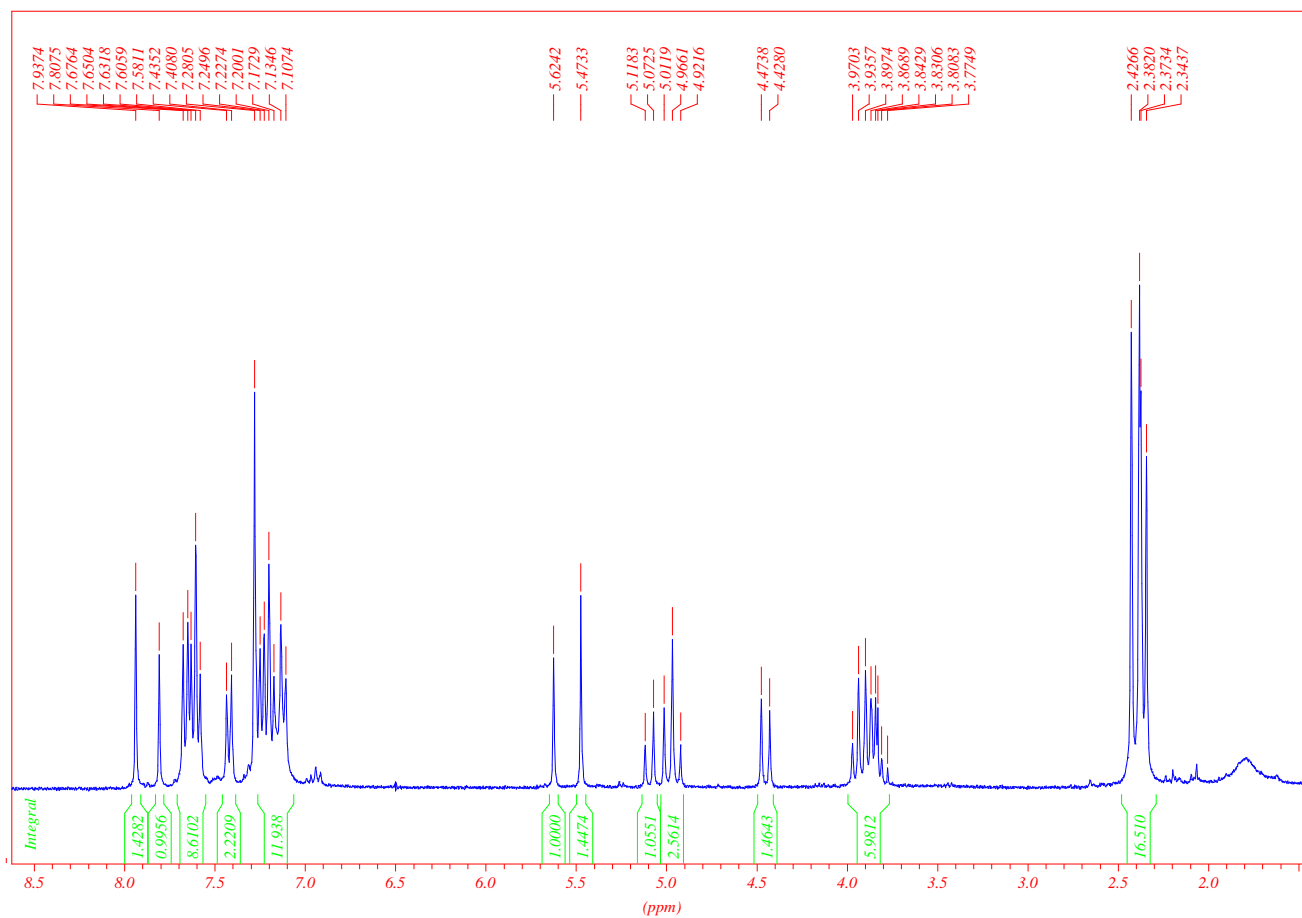

**(3a*RS*,6a*RS*)-5-Acetyl-6a-hydroxy-2-(4-methylphenyl)-3a-[4-(4-methylphenyl)-2*H*-1,2,3-triazol-2-yl]-3a,5,6,6a-tetrahydropyrrolo[3.4-*b*]pyrrol-4(3*H*)-one (3b)**

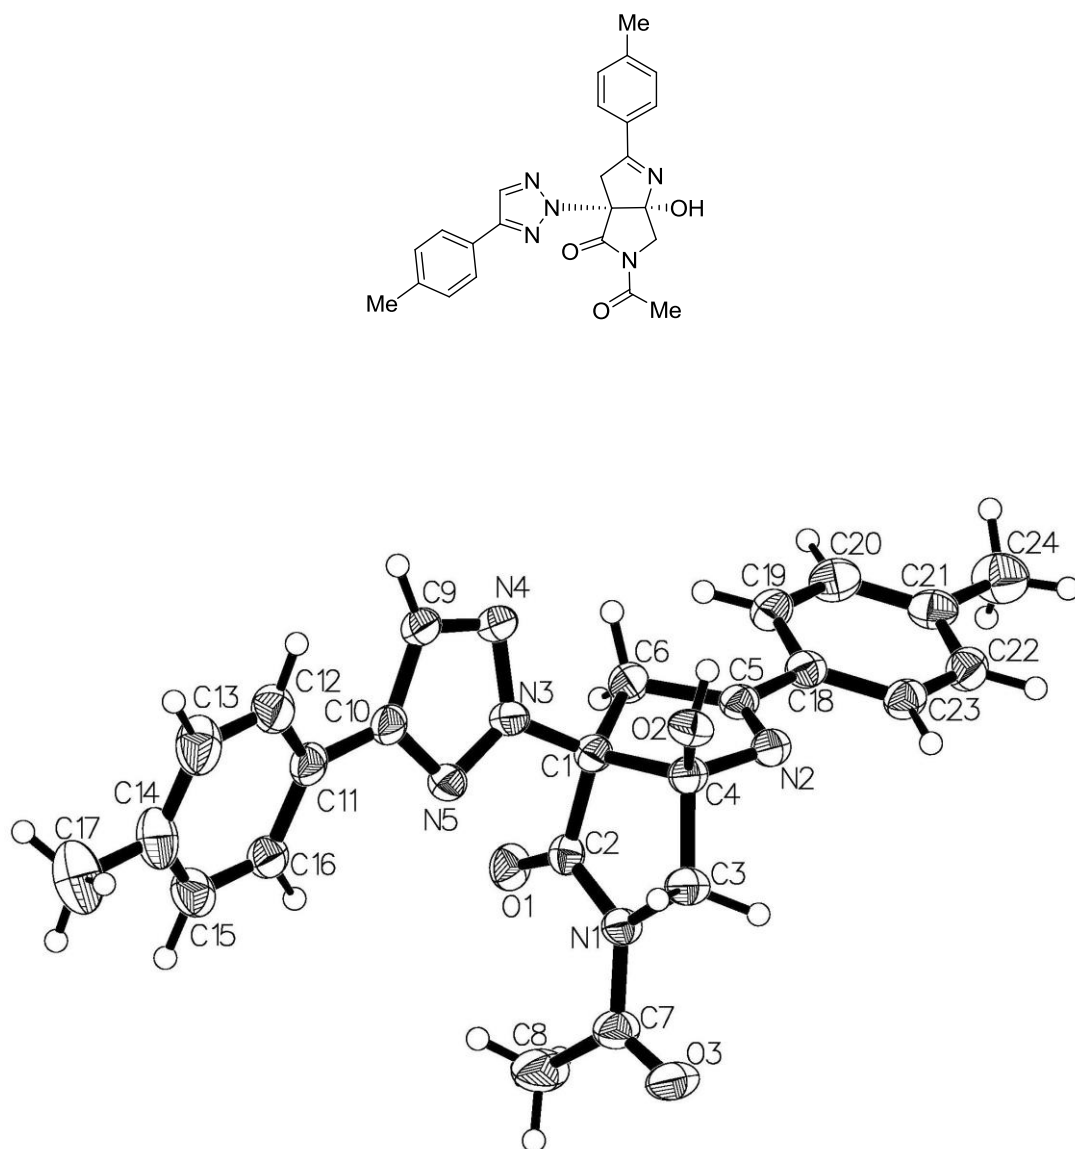

**Fig. 2** X-ray structure of compound **3b**.

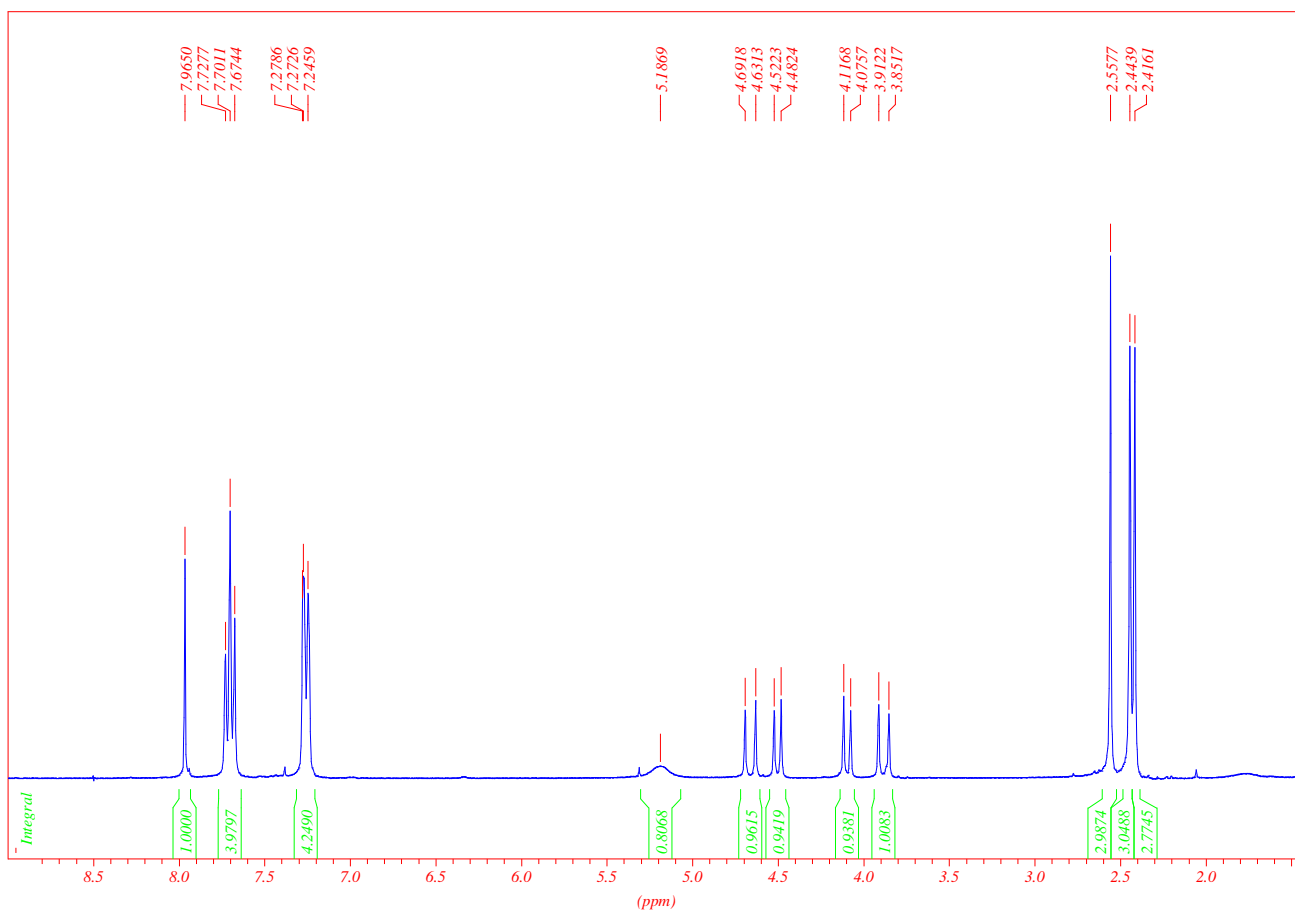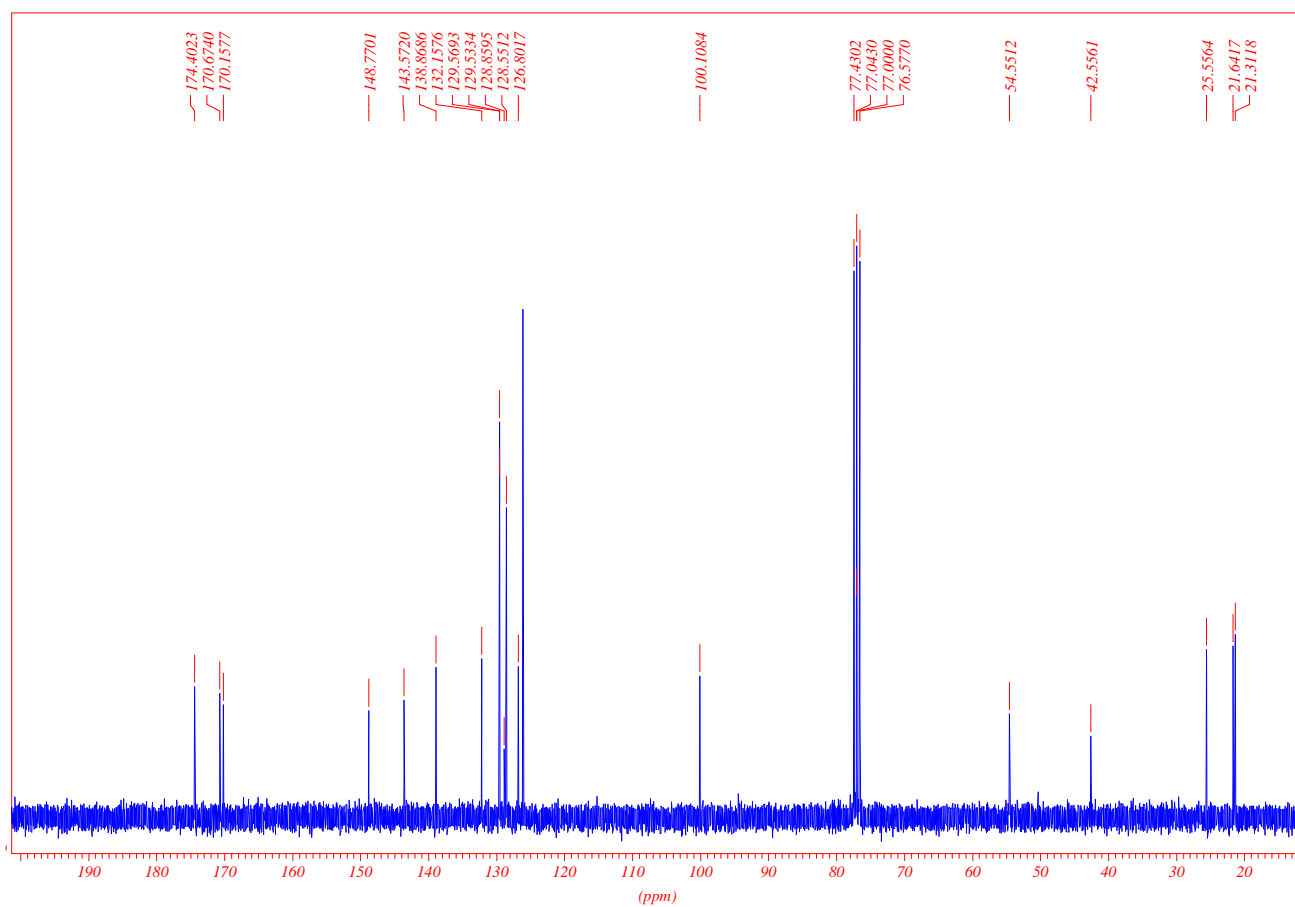

**7-Acetyl-3-(4-methylphenyl)-9-[4-(4-methylphenyl)-2H-1,2,3-triazol-2-yl]-1-oxa-4,7-diazaspiro[4.4]non-3-en-8-one (4b)**

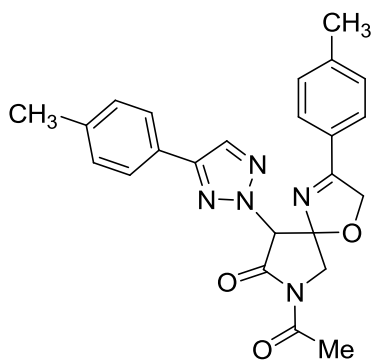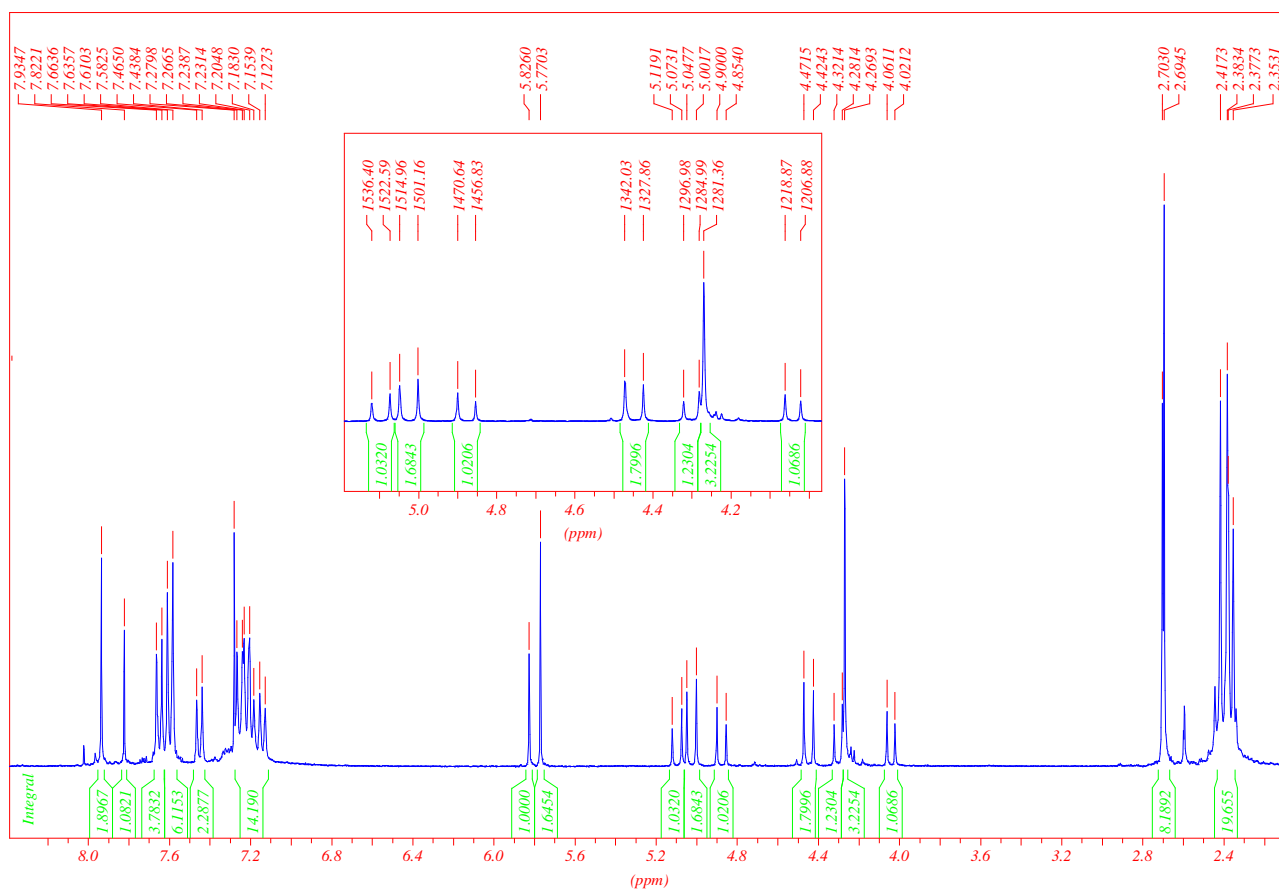

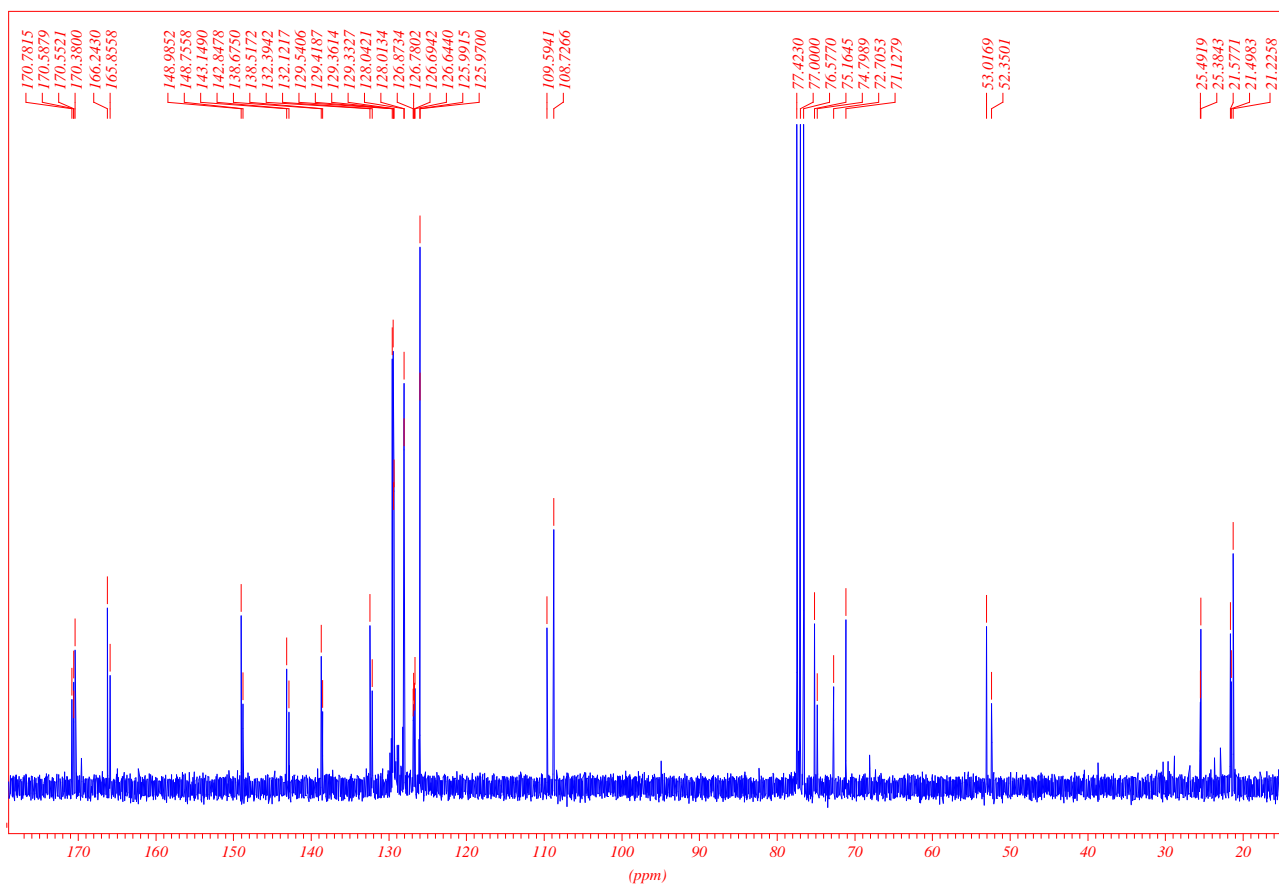

**(3*aRS*,6*aRS*)-5-Acetyl-6*a*-hydroxy-2-phenyl-3*a*-[4-phenyl-2*H*-1,2,3-triazol-2-yl]-3*a*,5,6,6*a*-tetrahydropyrrolo[3,4-*b*]pyrrol-4(3*H*)-one (3*c*)**

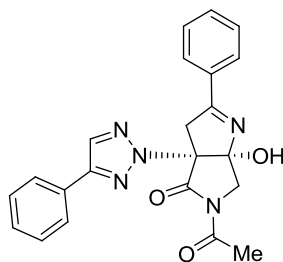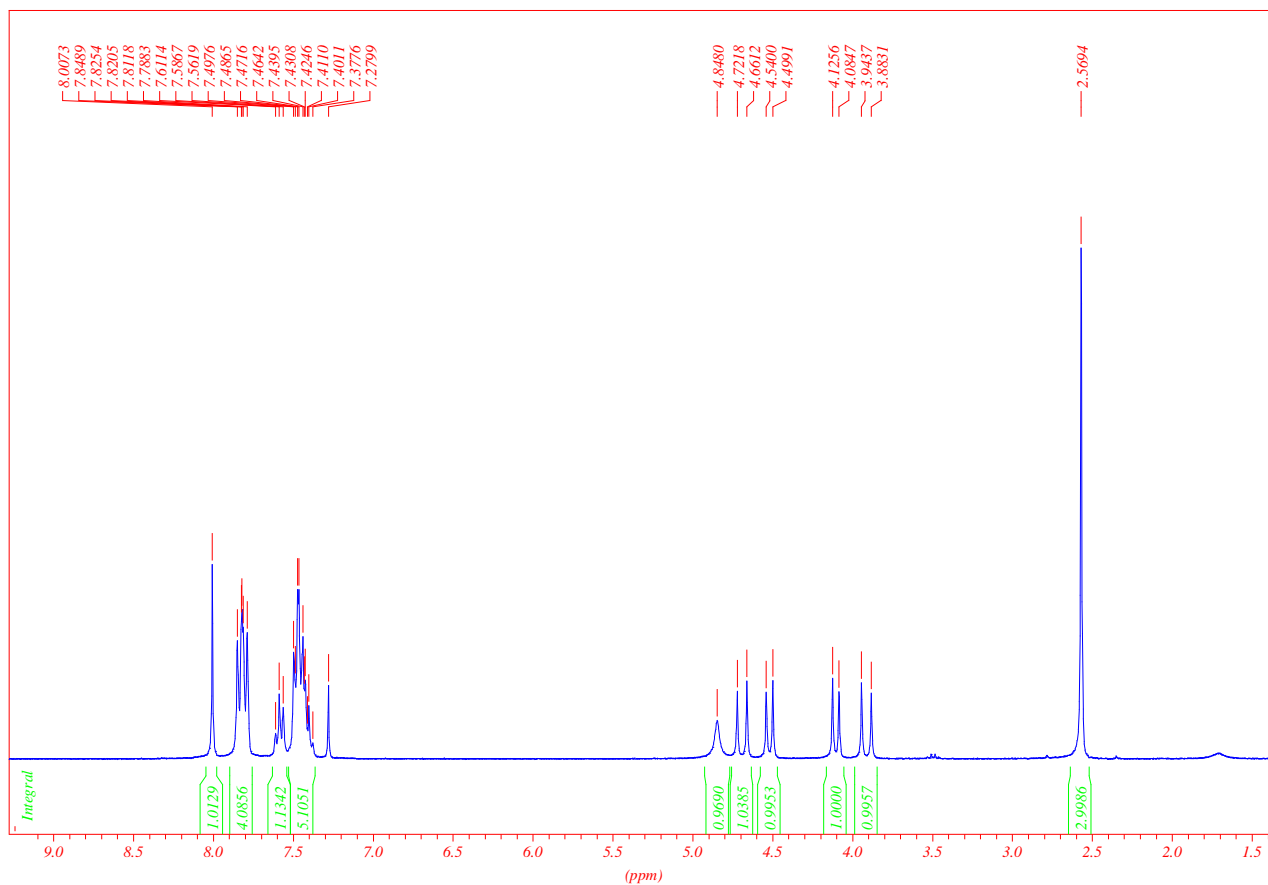

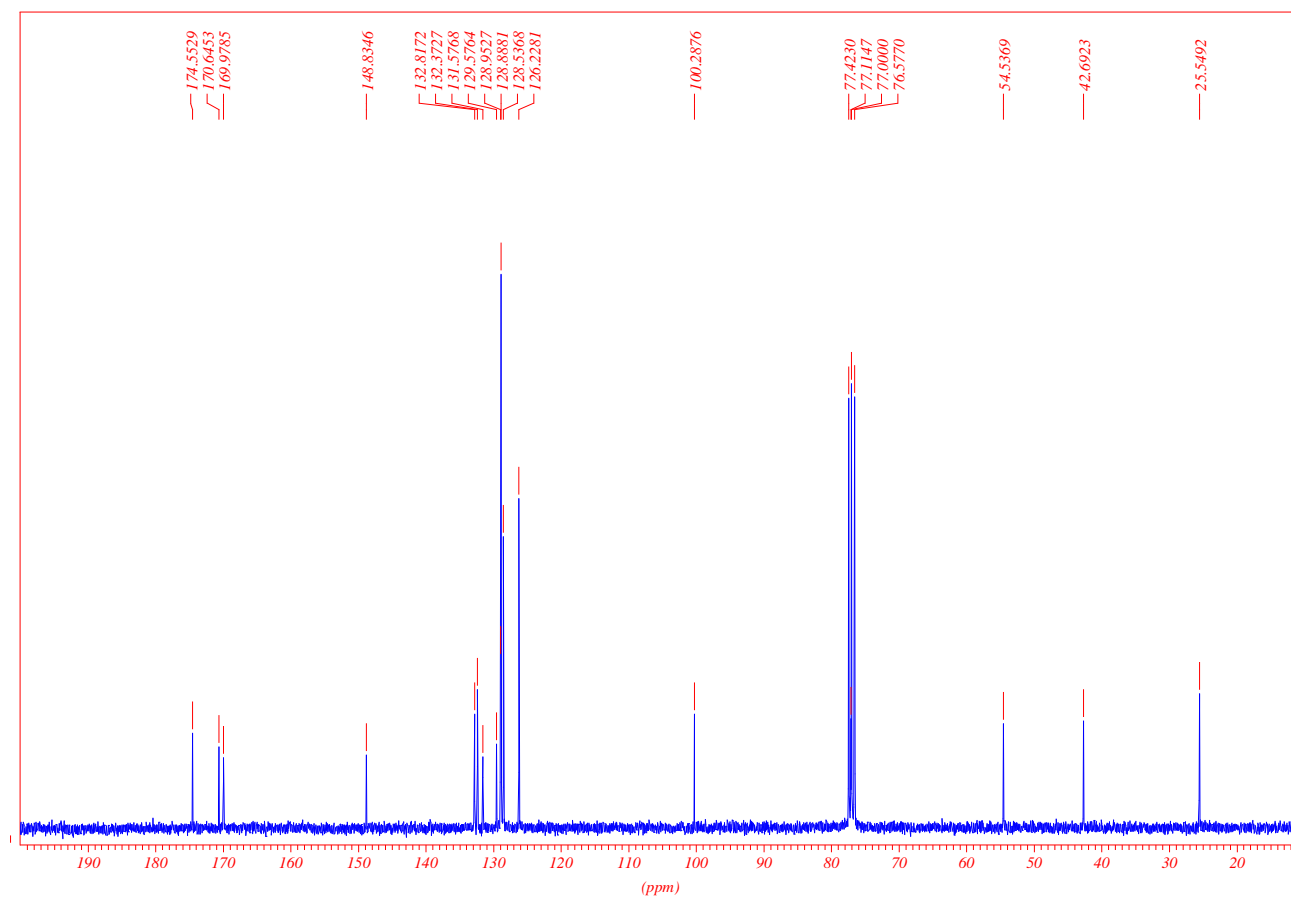



### 7-Acetyl-3-phenyl-9-[4-phenyl-2*H*-1,2,3-triazol-2-yl]-1-oxa-4,7-diazaspiro[4.4]non-3-en-8-one (4c)

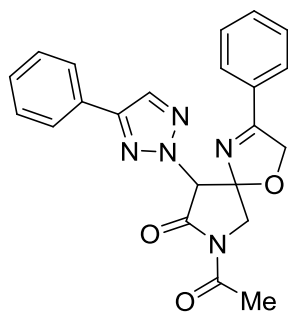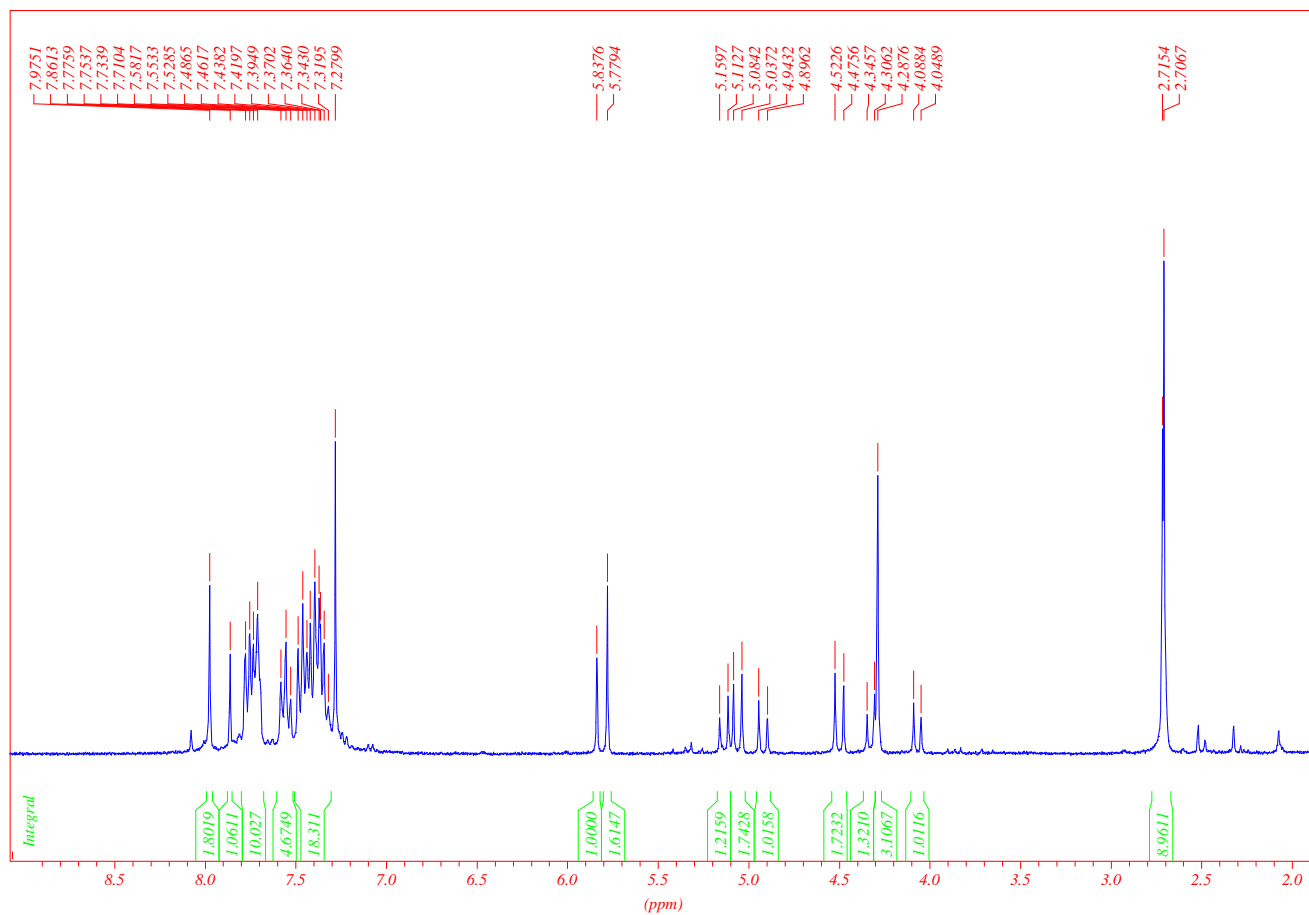

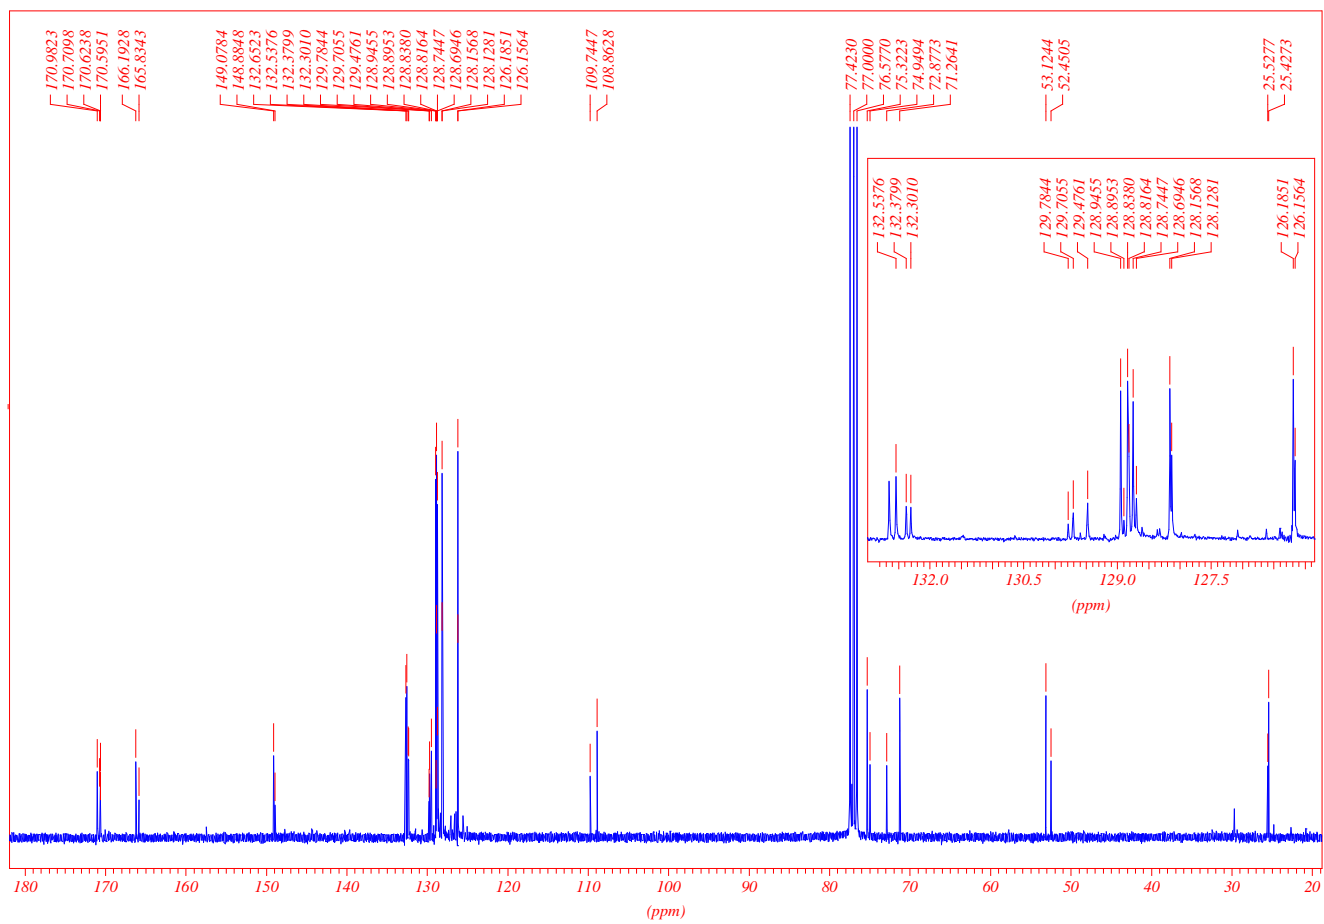

**(3a*RS*,6a*RS*)-5-Acetyl-6a-hydroxy-2-(4-methoxyphenyl)-3a-[4-(4-methoxyphenyl)-2*H*-1,2,3-triazol-2-yl]-3a,5,6,6a-tetrahydropyrrolo[3,4-*b*]pyrrol-4(3*H*)-one (3d)**

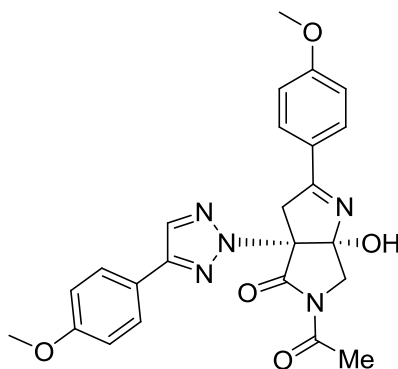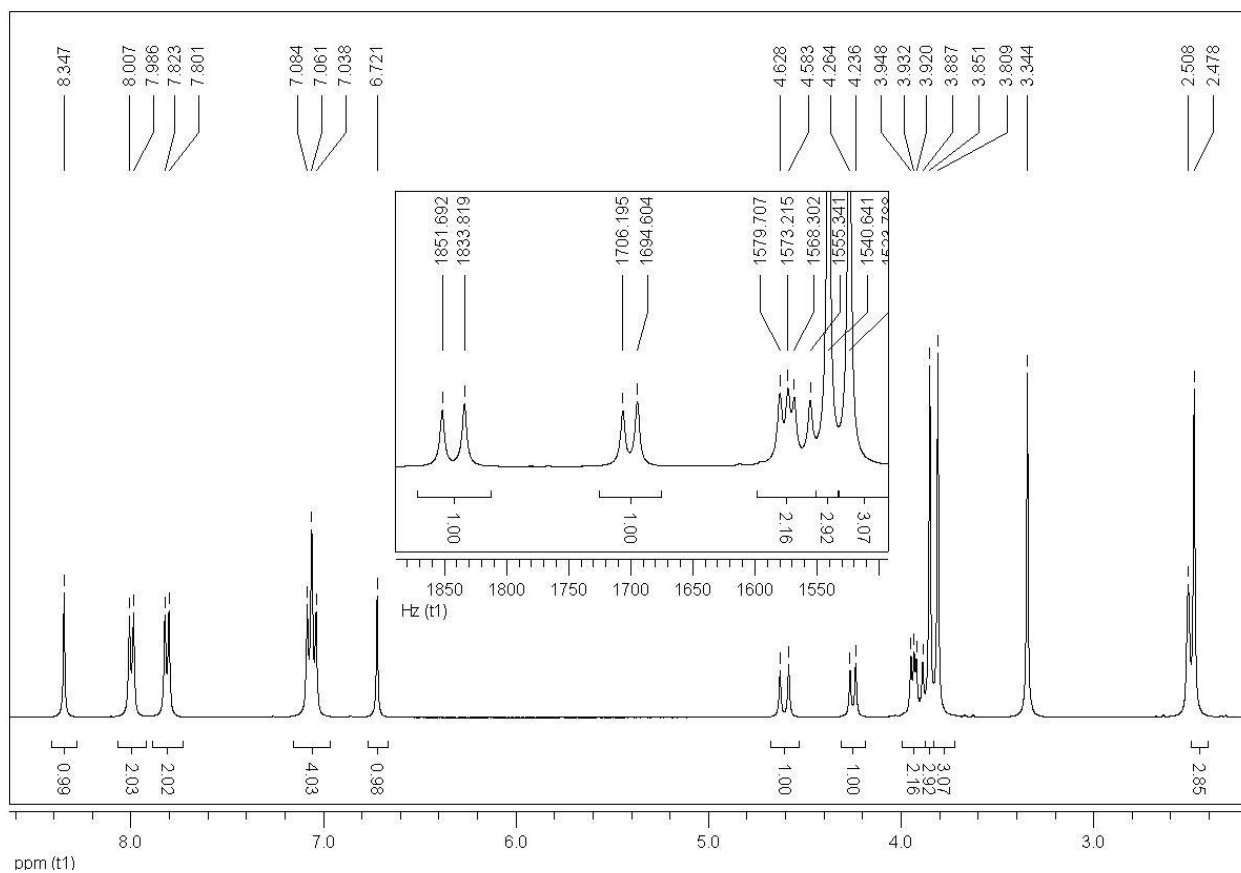

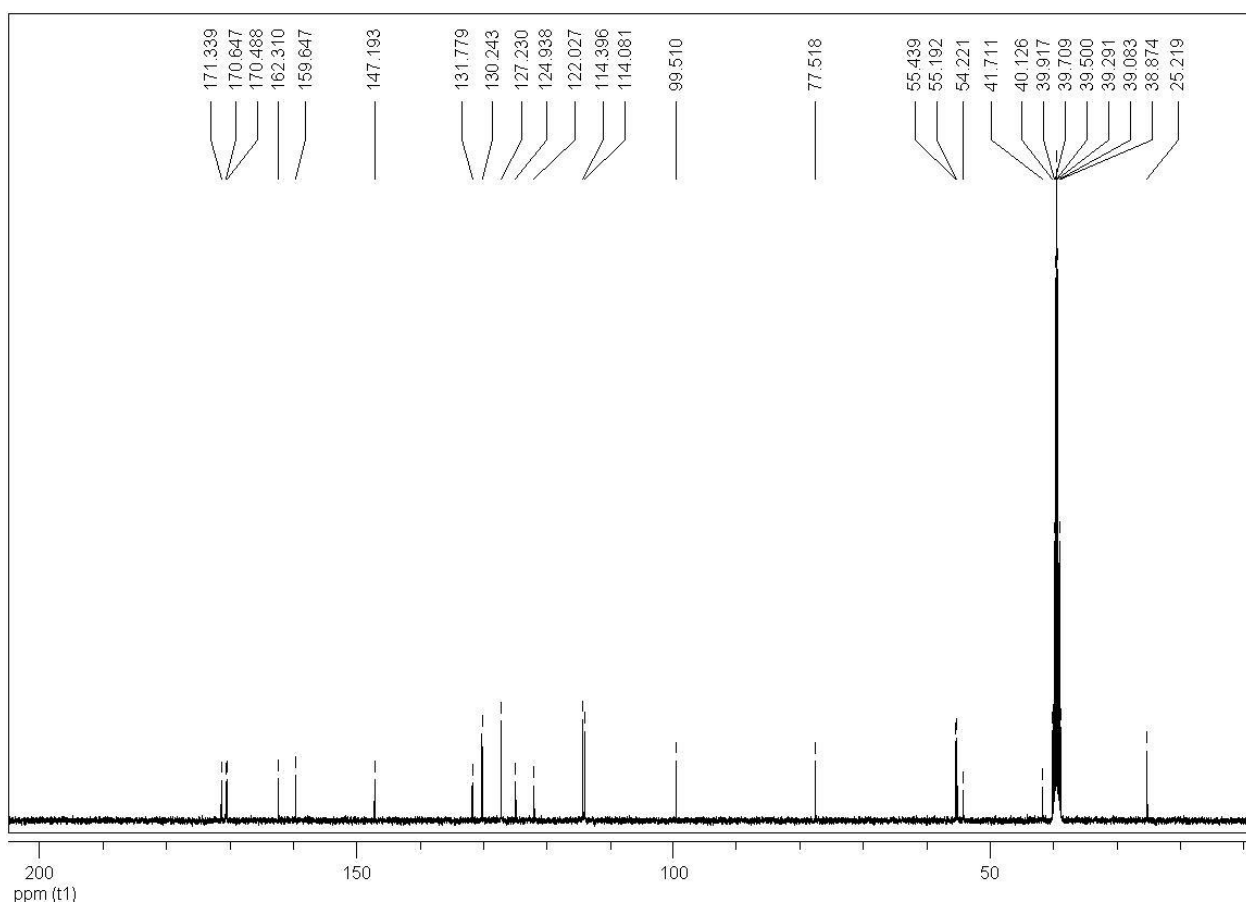



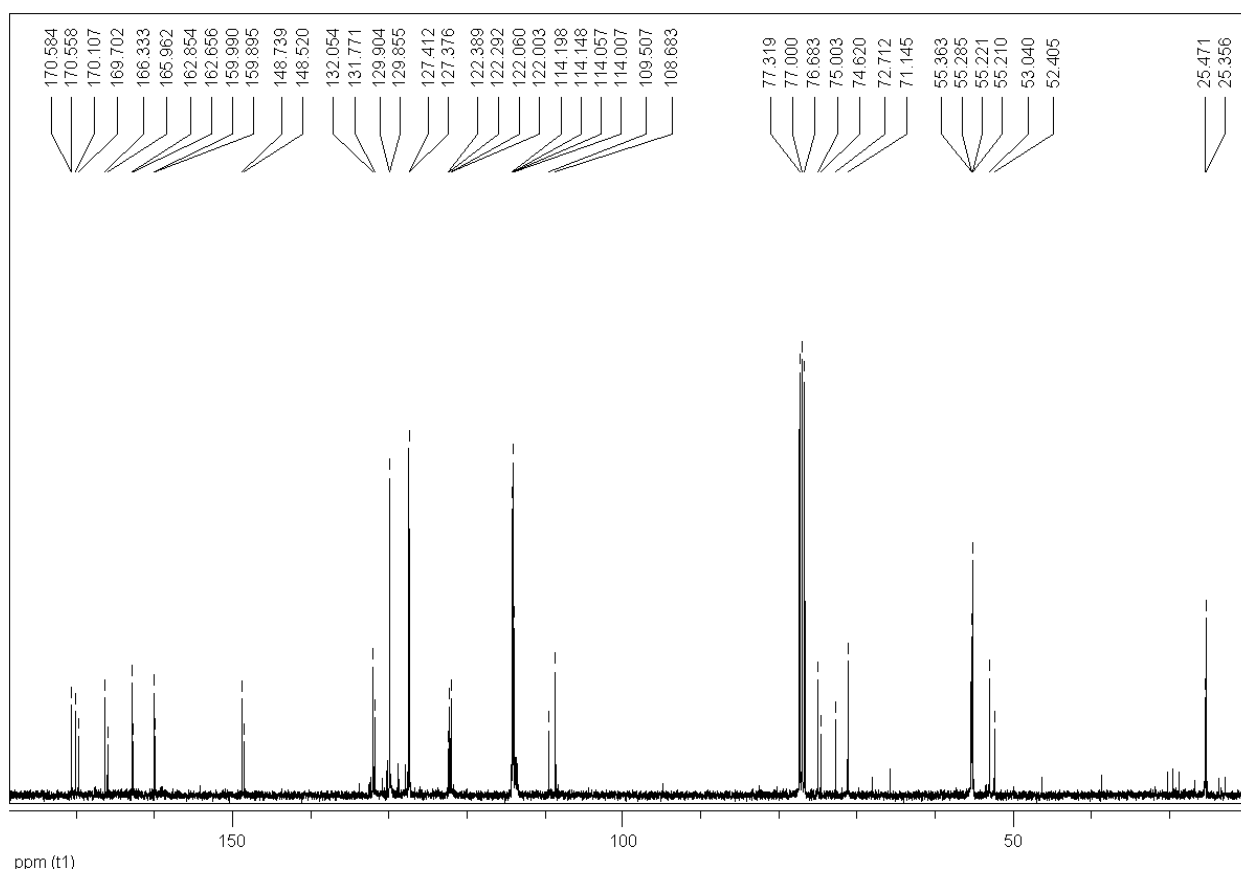

***tert*-Butyl (3*aRS*,6*aRS*)-6*a*-hydroxy-2-(4-methylphenyl)-3*a*-[4-(4-methylphenyl)-2*H*-1,2,3-triazol-2-yl]-4-oxo-3*a*,4,6,6*a*-tetrahydropyrrolo[3,4-*b*]pyrrole-5(3*H*)-carboxylate (3e)**

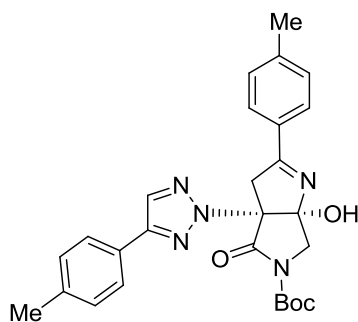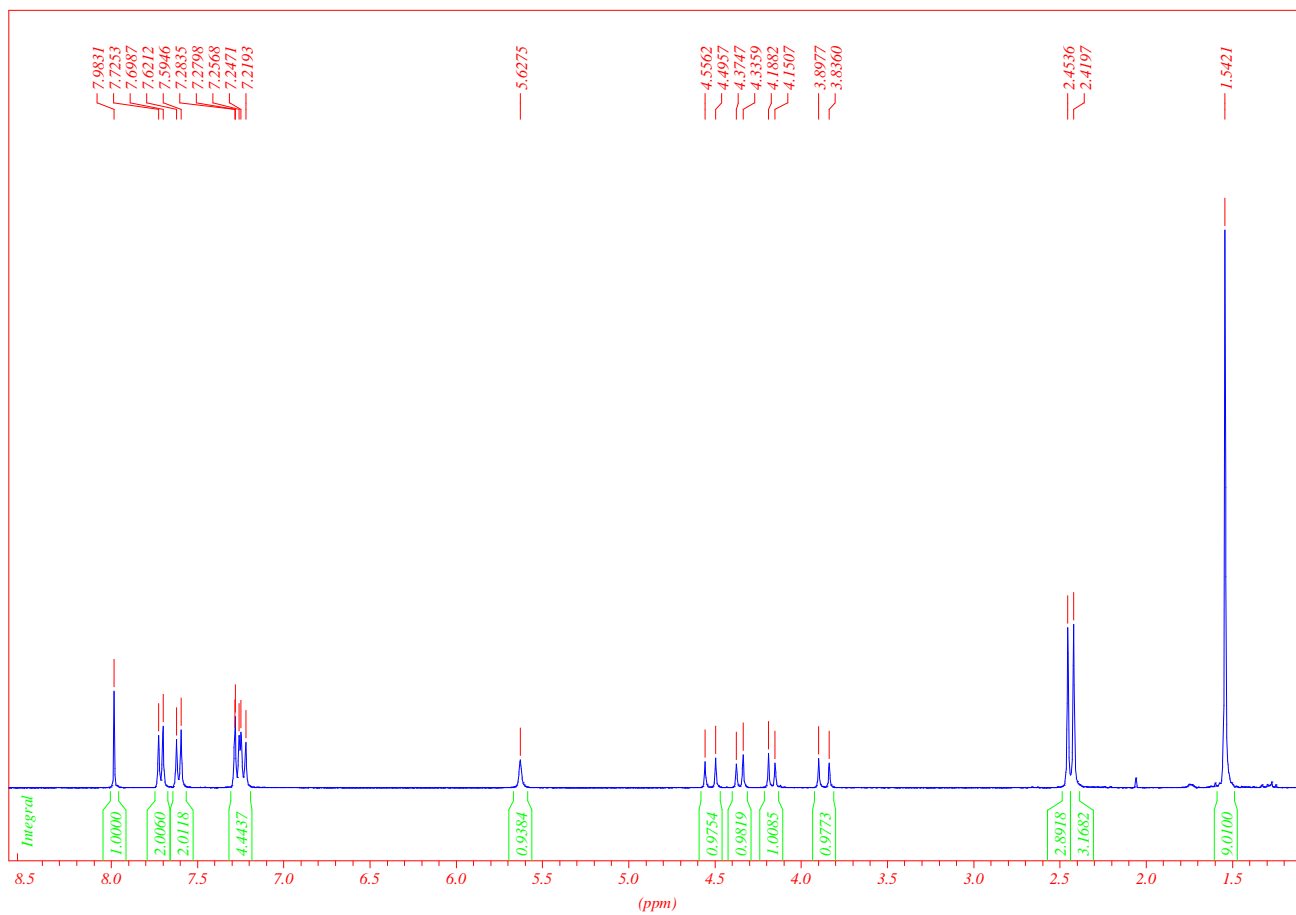

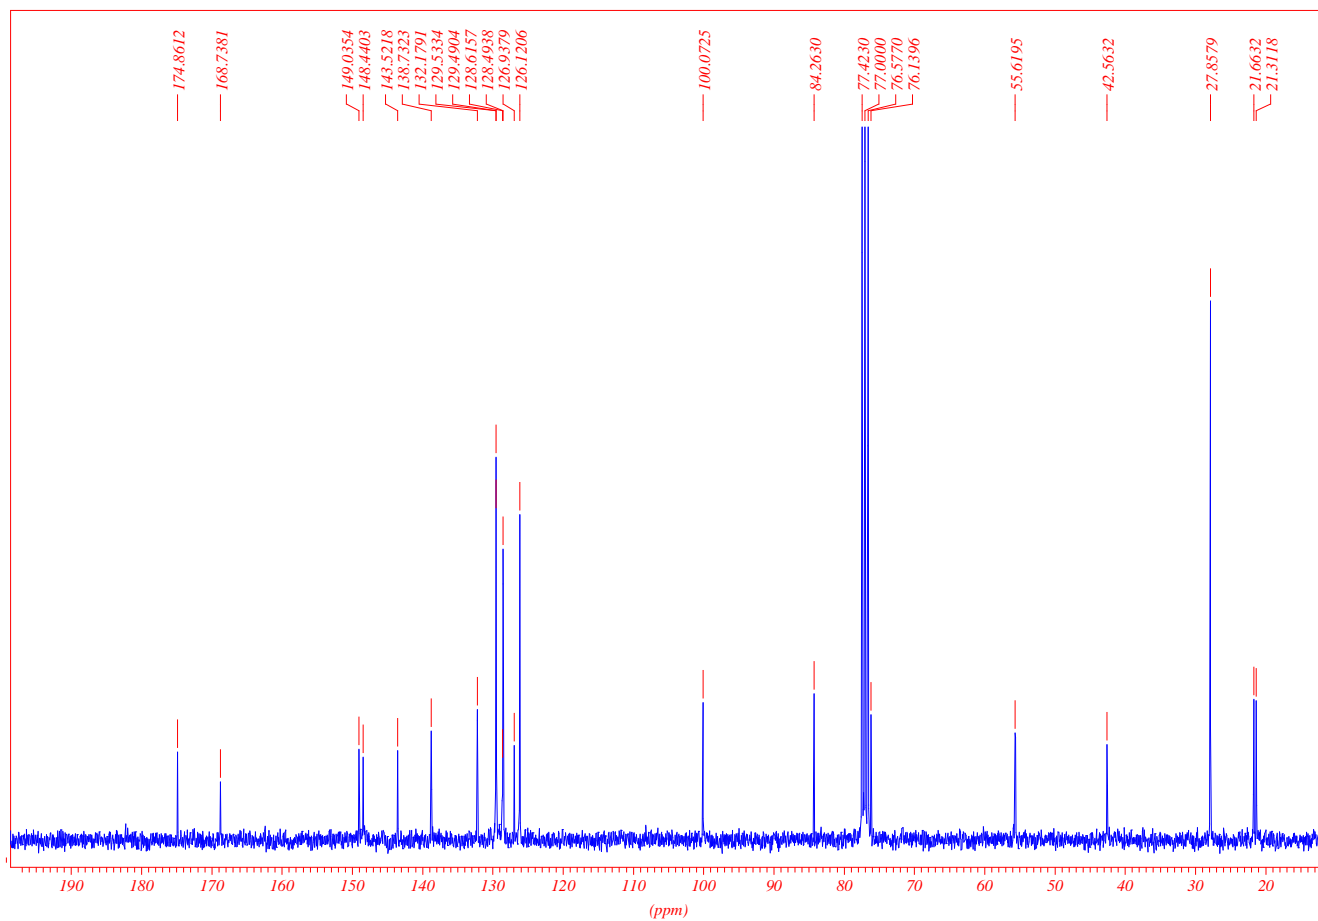



***tert*-Butyl 3-(4-methylphenyl)-9-[4-(4-methylphenyl)-2*H*-1,2,3-triazol-2-yl]-8-oxo-1-oxa-4,7-diaza-spiro[4.4]non-3-ene-7-carboxylate (4e)**

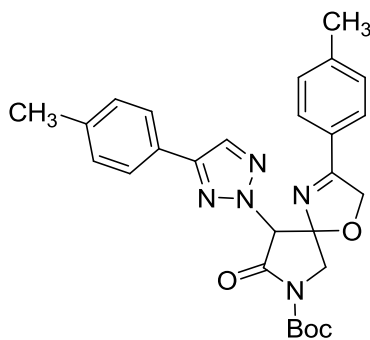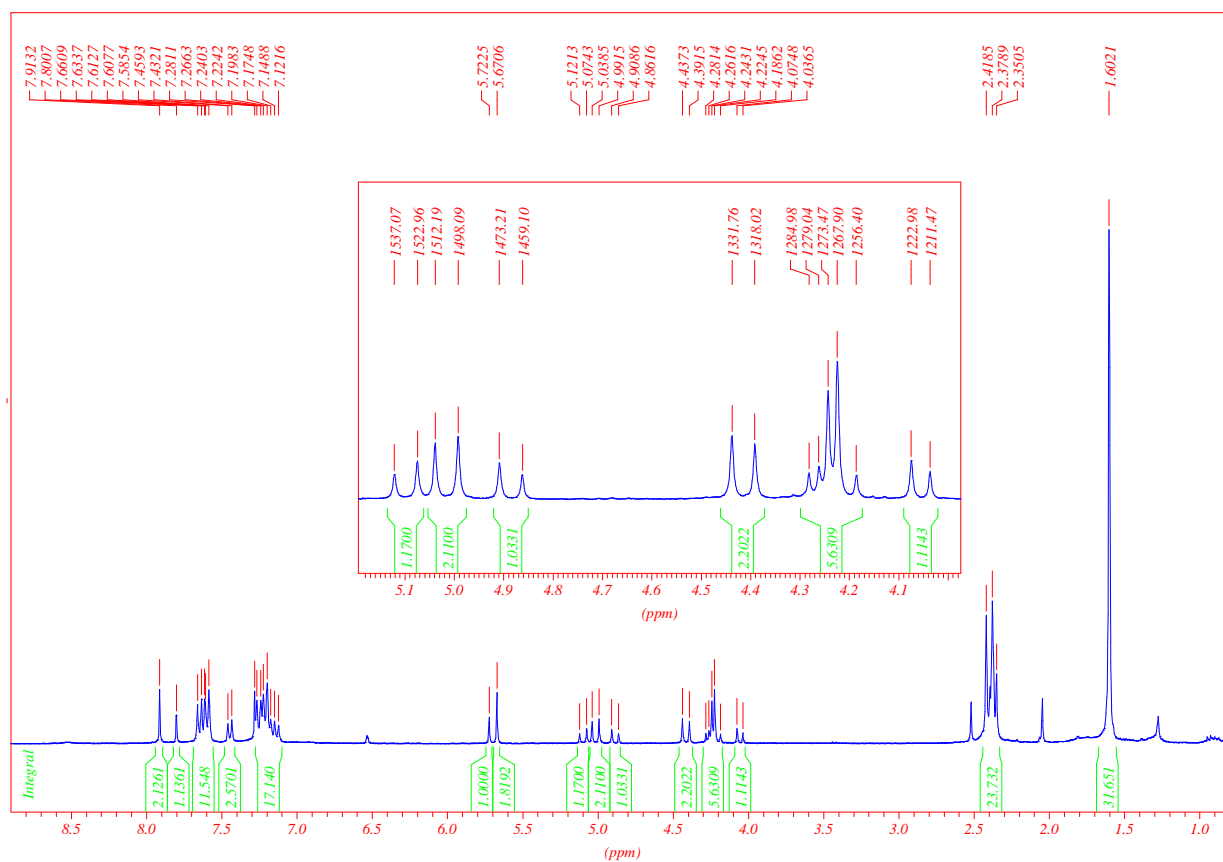

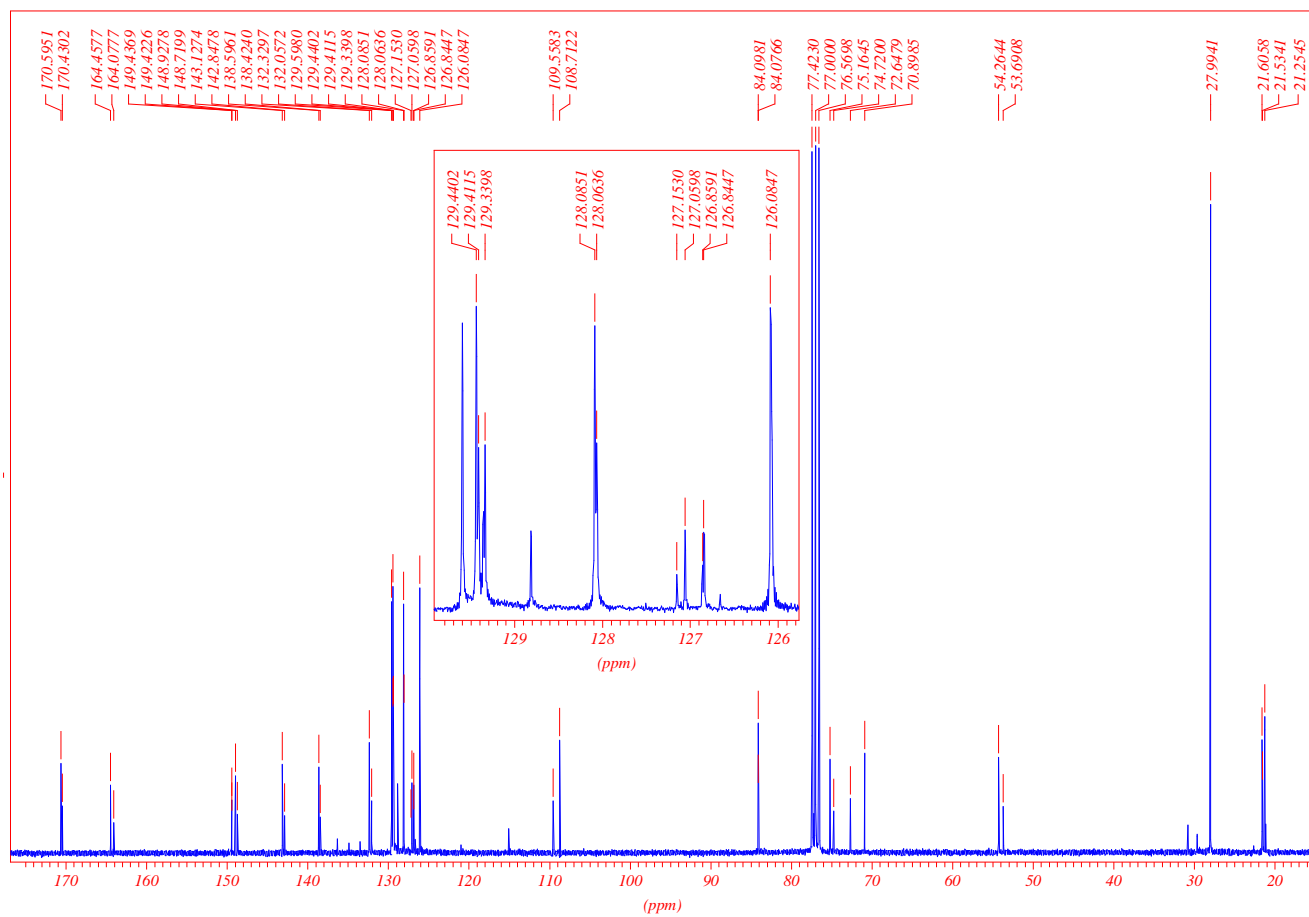

**(3a*RS*,6a*RS*)-6a-Hydroxy-5-(4-methoxybenzyl)-2-(4-methylphenyl)-3a-[4-(4-methylphenyl)-2*H*-1,2,3-triazol-2-yl]-3a,5,6,6a-tetrahydropyrrolo[3,4-*b*]pyrrol-4(3*H*)-one (3f)**

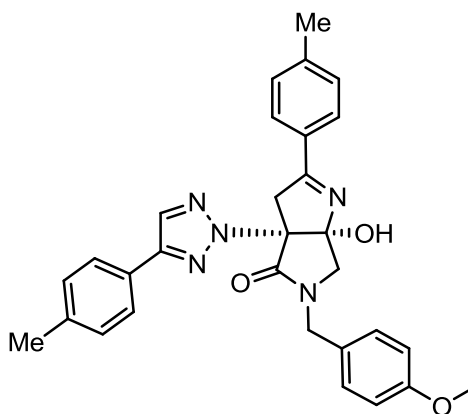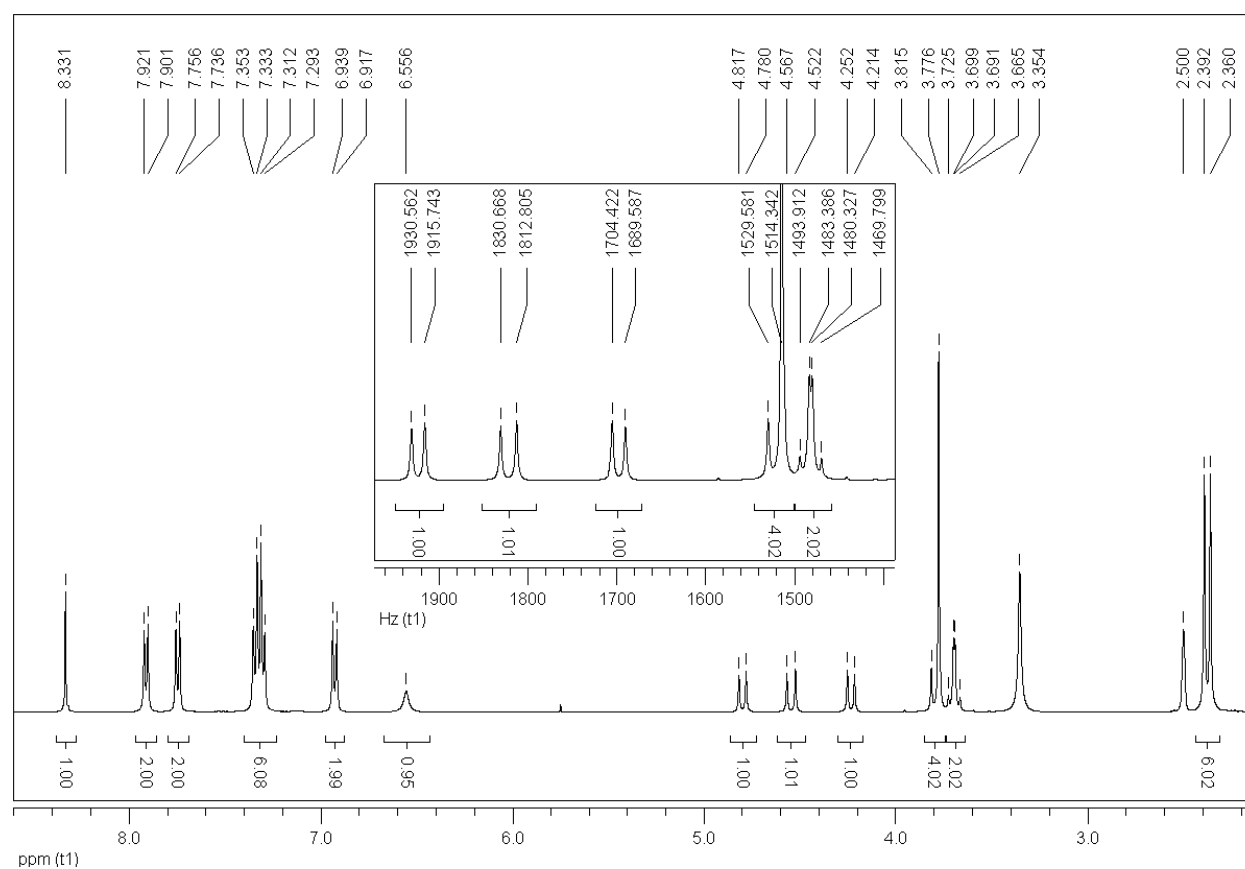

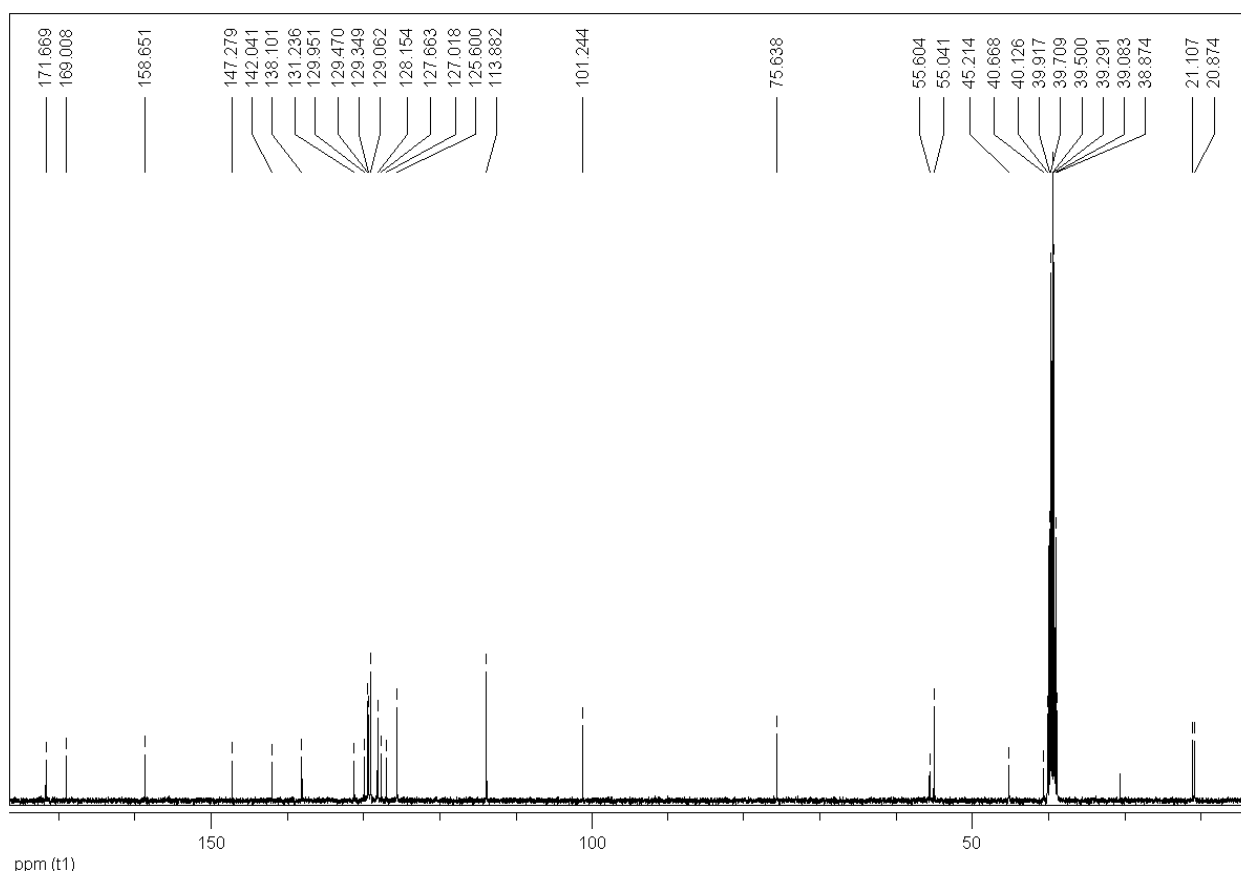

**7-(4-Methoxybenzyl)-3-(4-methylphenyl)-9-[(4-methylphenyl)-2H-1,2,3-triazol-2-yl]-1-oxa-4,7-diazaspiro[4.4]non-3-en-8-one (4f)**

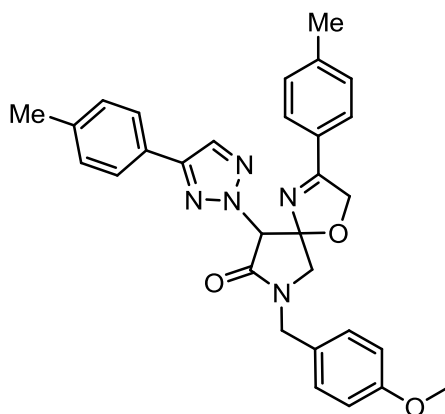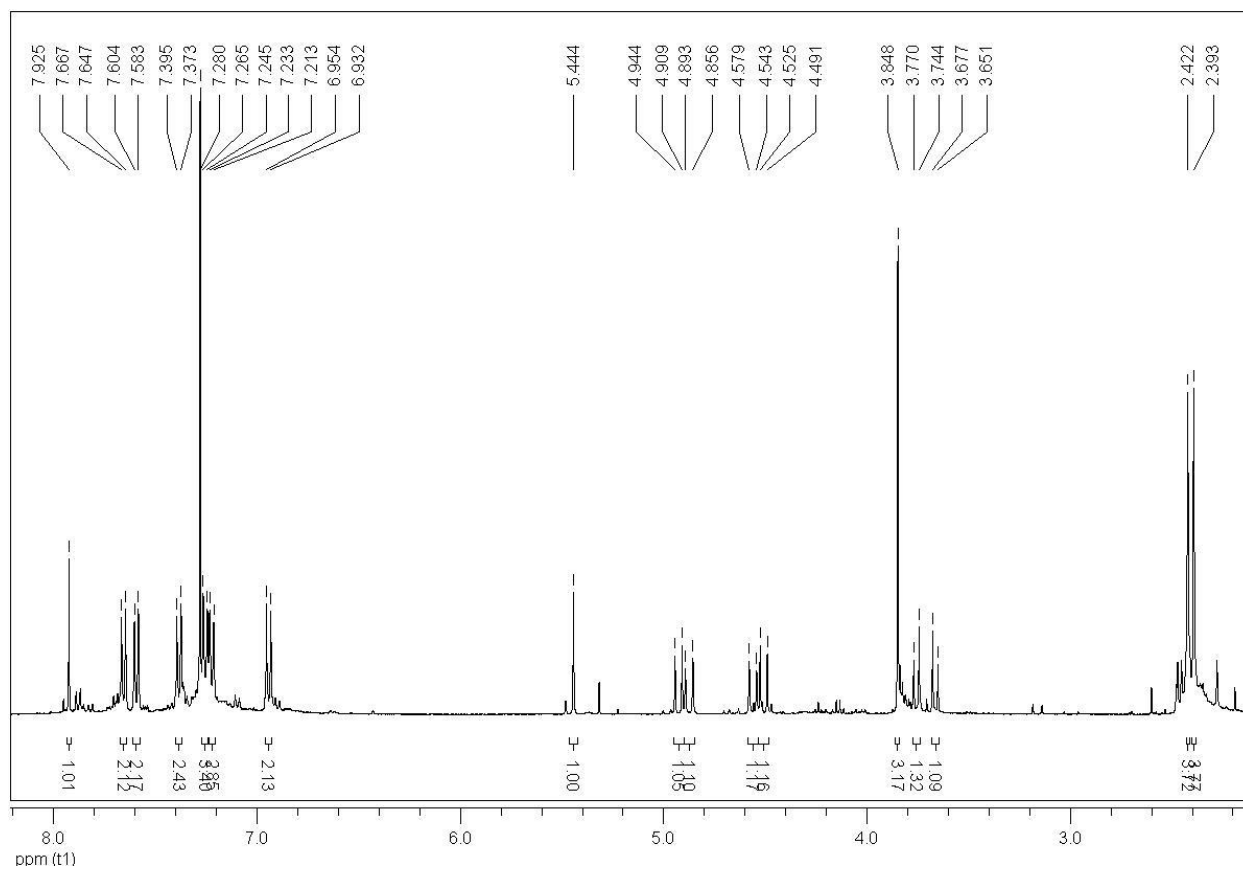

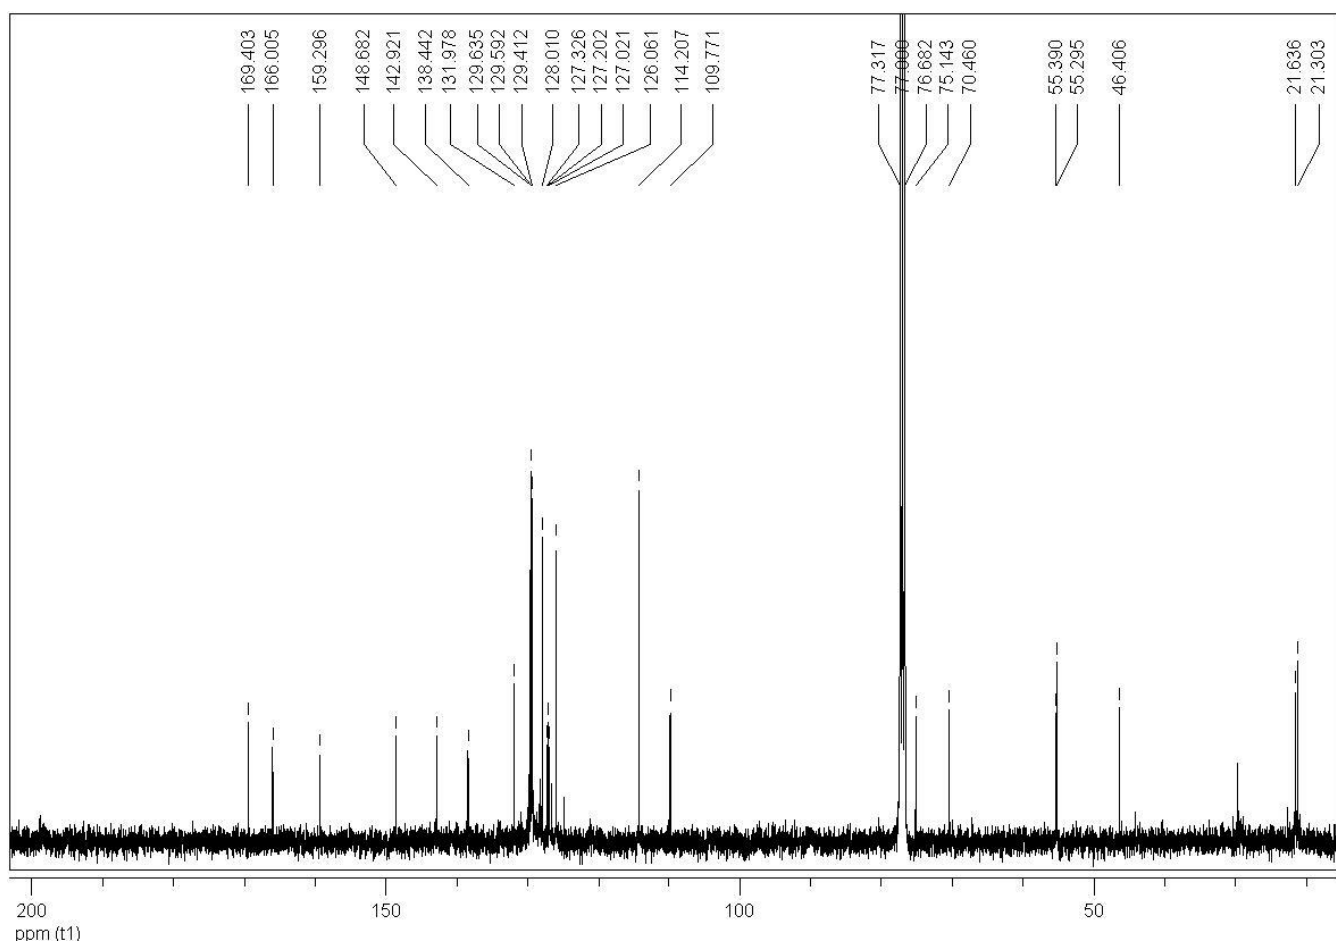

**(3*aRS*,6*aSR*)-6*a*-Hydroxy-2-(4-methylphenyl)-3*a*-[4-(4-methylphenyl)-1,2,3-triazol-2-yl]-6,6-dihydro-3*H*-furo[3,4-*b*]pyrrol-4(3*aH*)-one (6*a*)**

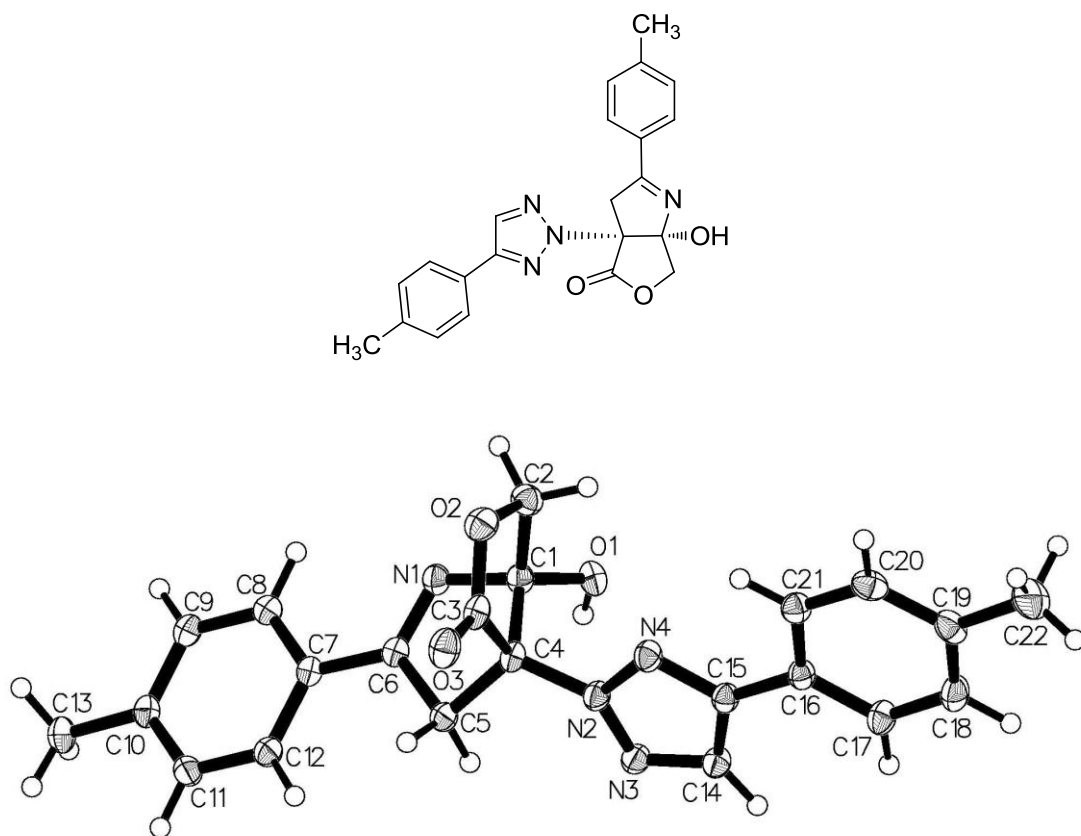

**Fig. 3** X-ray structure of compound **6a**.

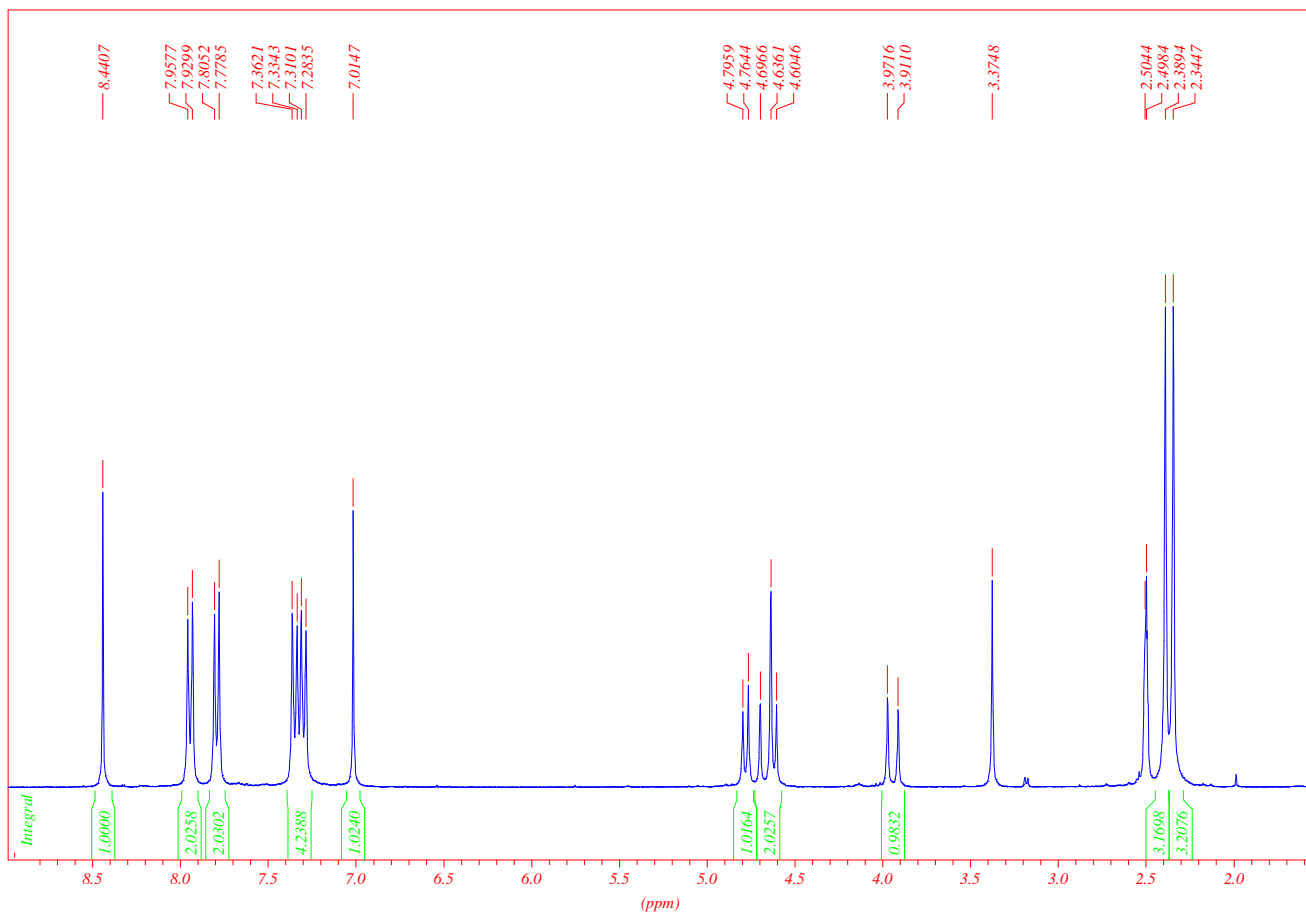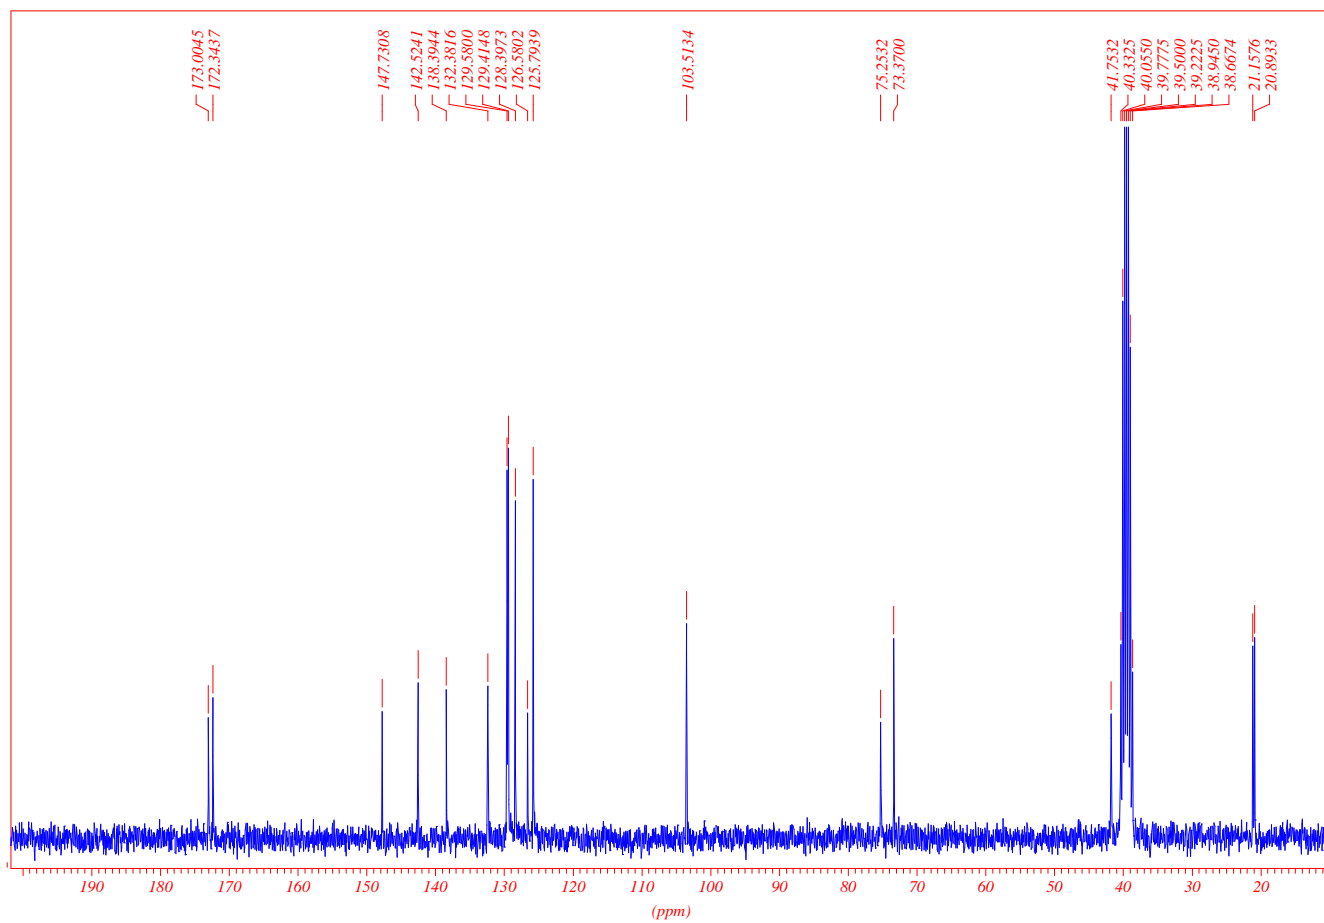



**(5*RS*,9*SR*)-3-(4-Methylphenyl)-9-[4-(4-methylphenyl)-1,2,3-triazol-2-yl]-1,7-dioxo-4-azaspiro[4.4]non-3-en-8-one ((5*RS*,9*SR*)-7a)**

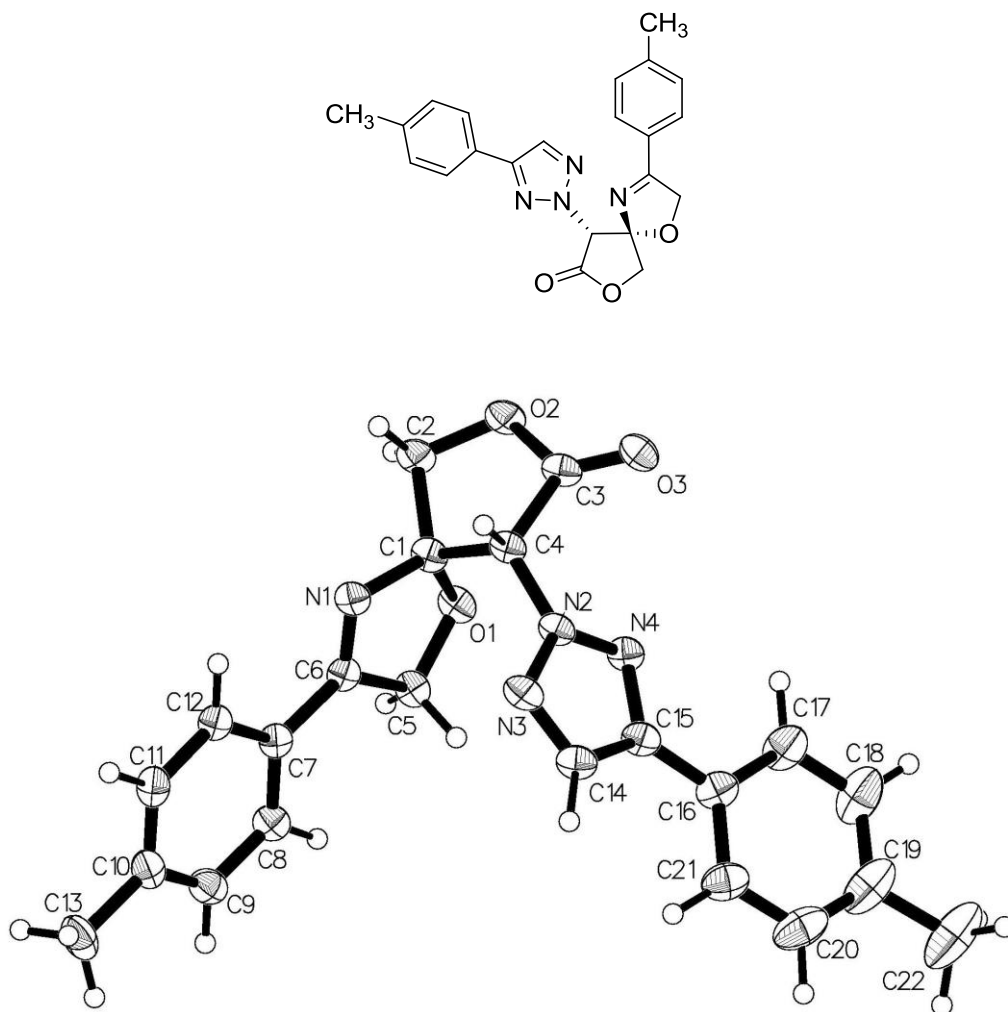

**Fig. 4** X-ray structure of compound (5*RS*,9*SR*)-7a.

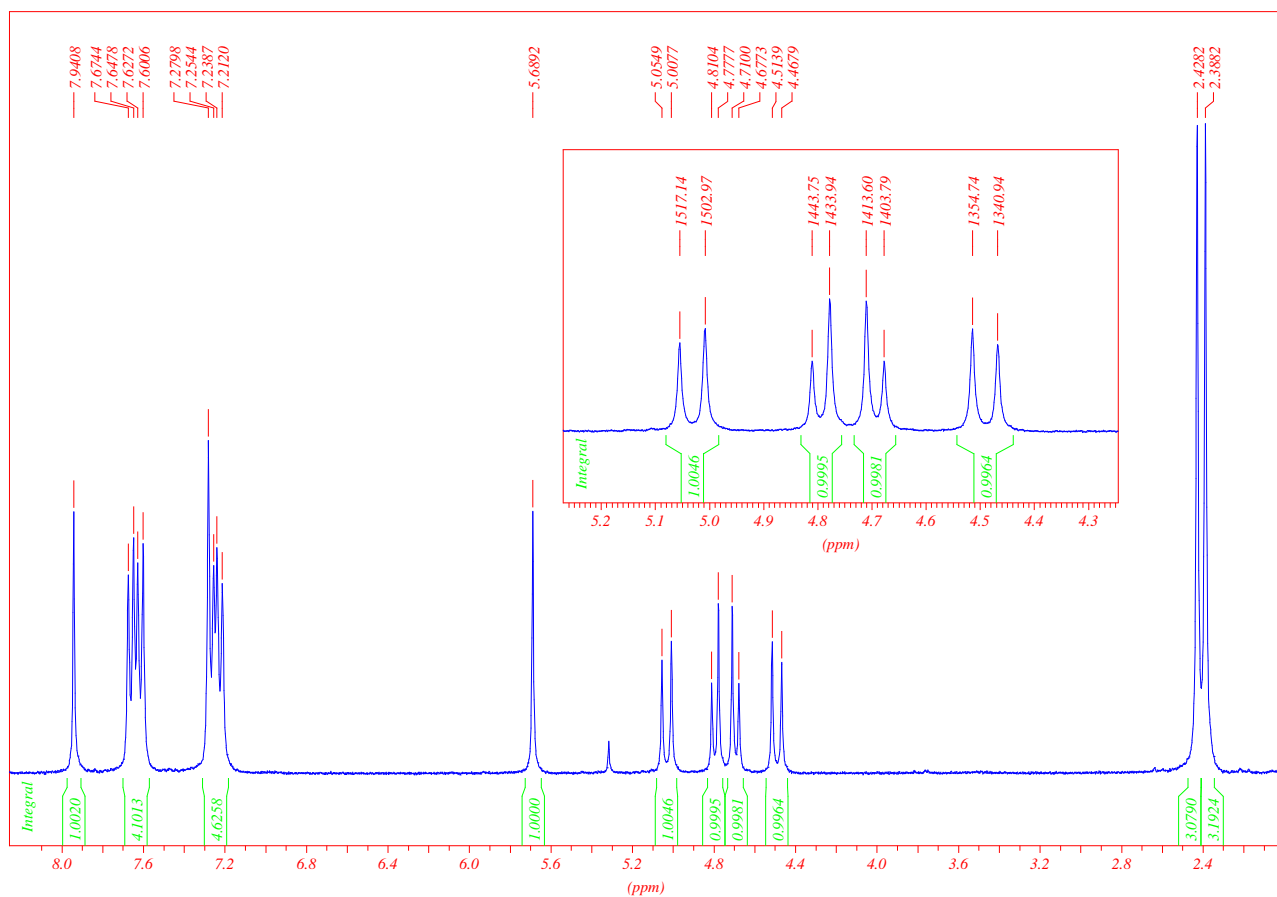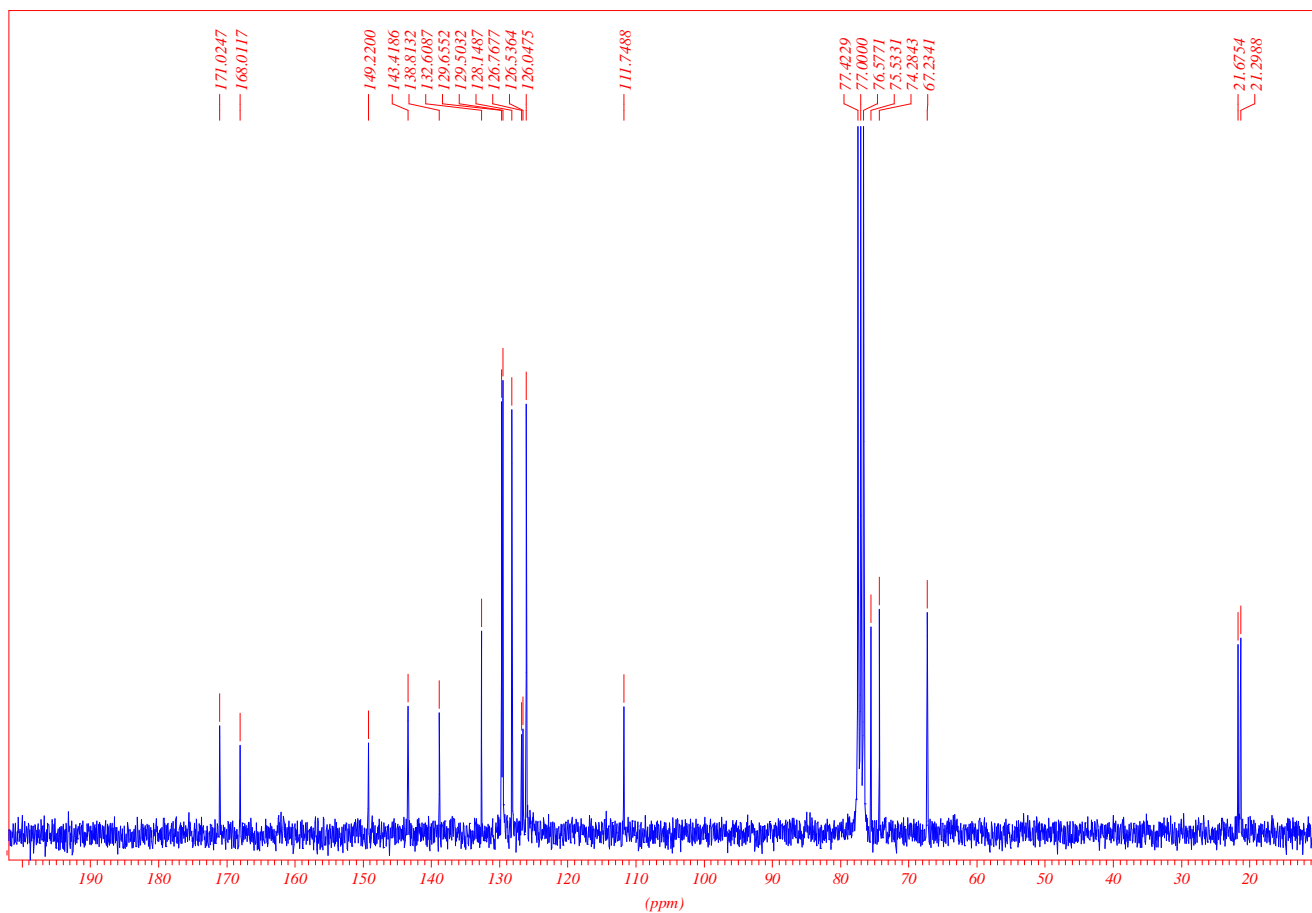

**3-(4-Methylphenyl)-9-[4-(4-methylphenyl)-1,2,3-triazol-2-yl]-1,7-dioxo-4-azaspiro[4.4]non-3-en-8-one (7a) (diastereomeric mixture)**

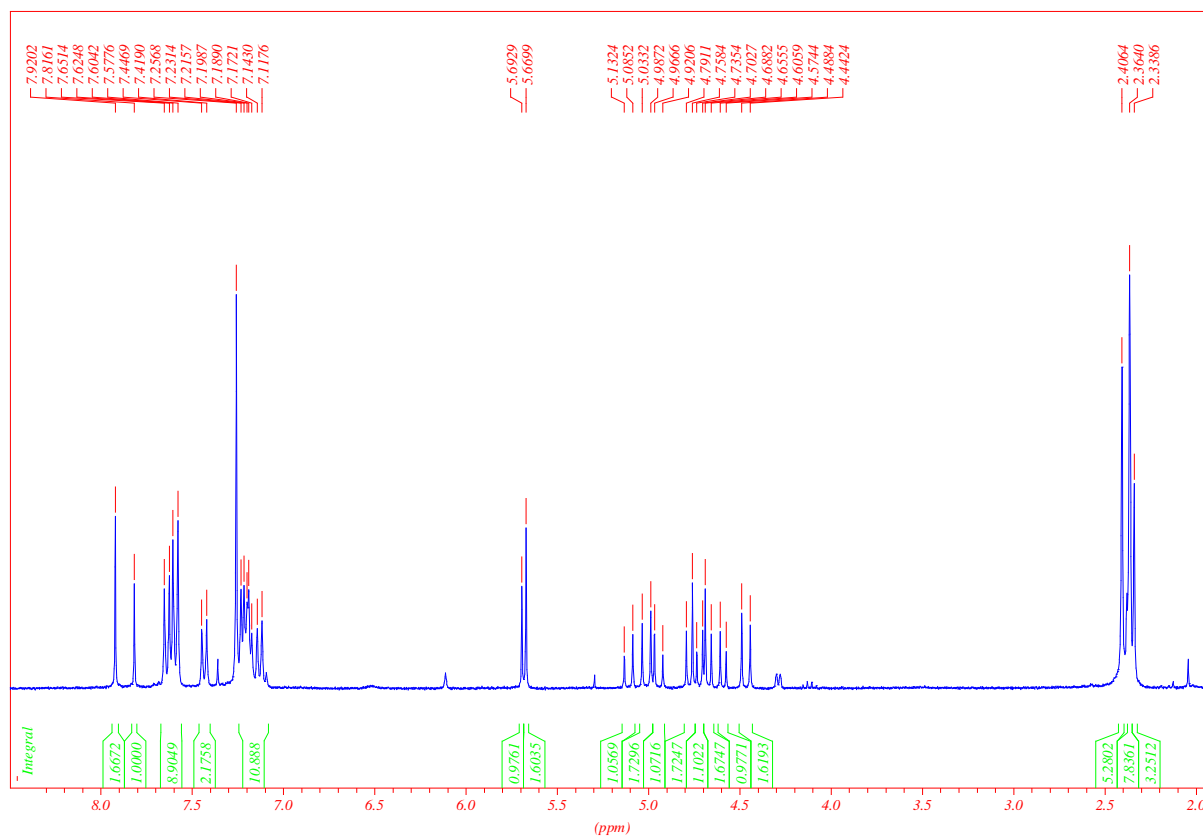

**(3*aRS*,6*aSR*)-6*a*-Hydroxy-2-phenyl-3*a*-(4-phenyl-1,2,3-triazol-2-yl)-6,6*a*-dihydro-3*H*-furo[3,4-*b*]pyrrol-4(3*aH*)-one (6*b*)**

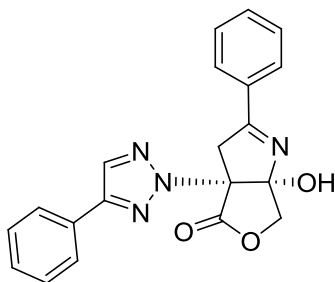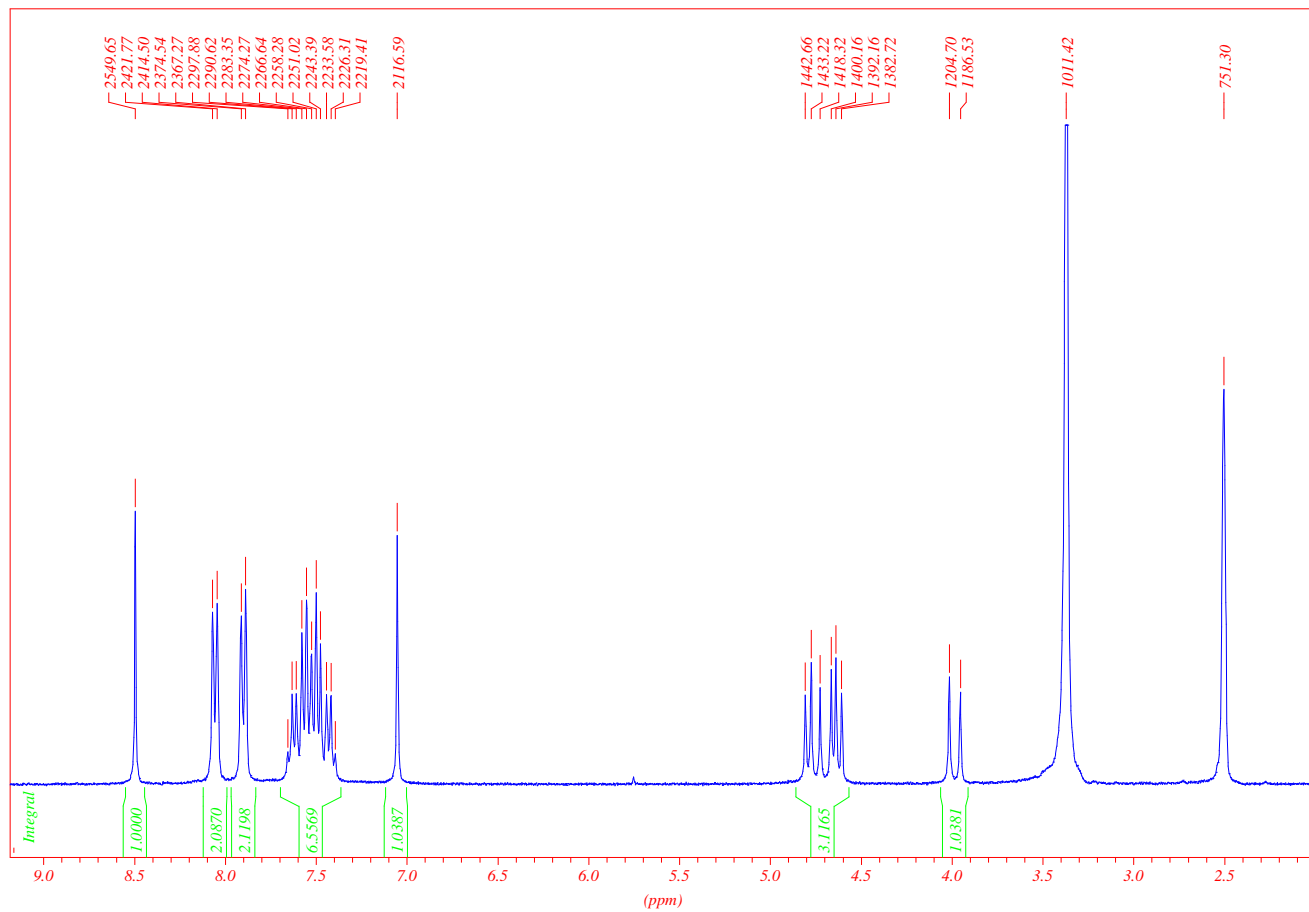

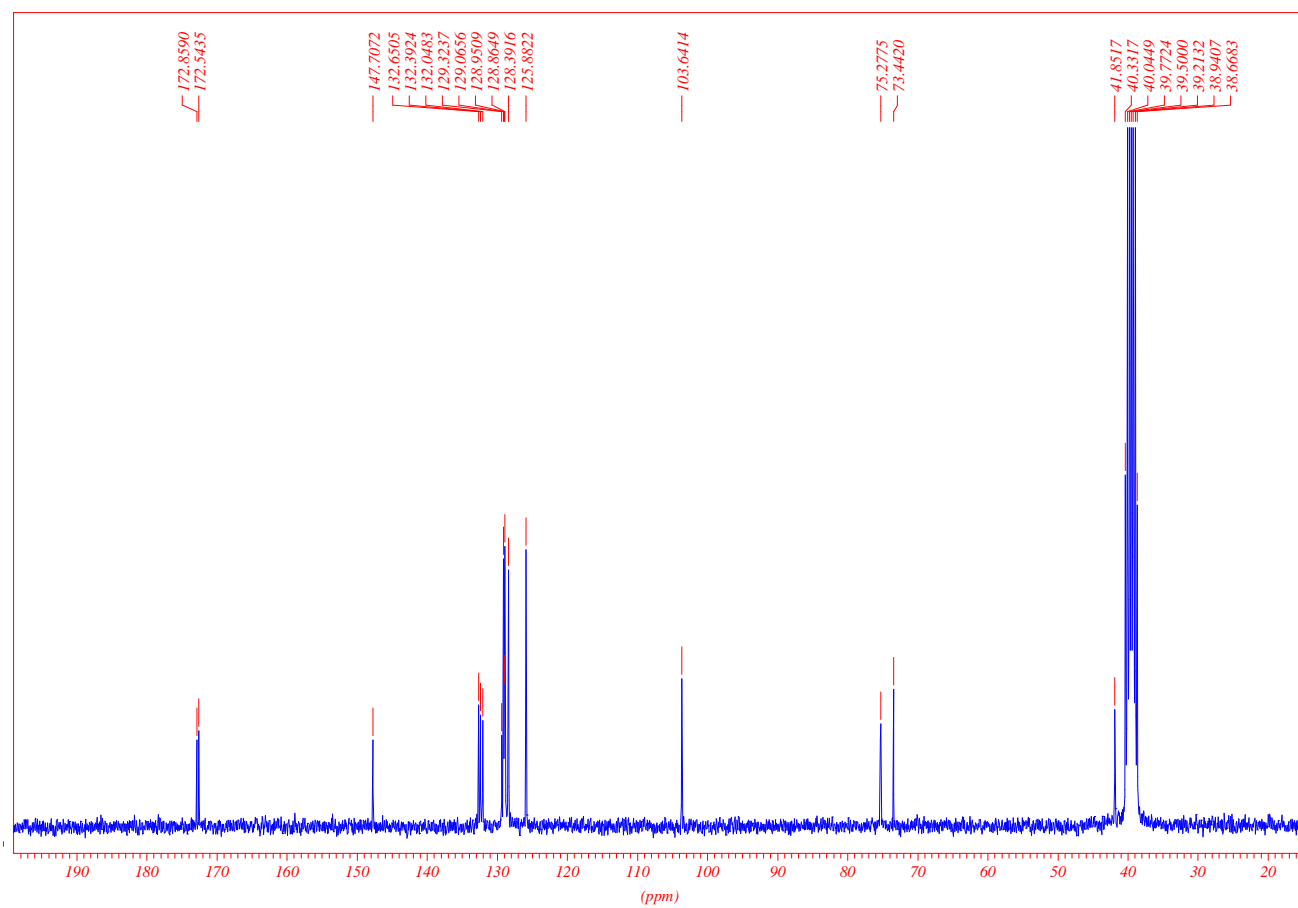

### 3-Phenyl-9-(4-phenyl-1,2,3-triazol-2-yl)-1,7-dioxo-4-aza-spiro[4.4]non-3-en-8-one (7b)

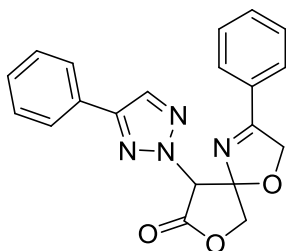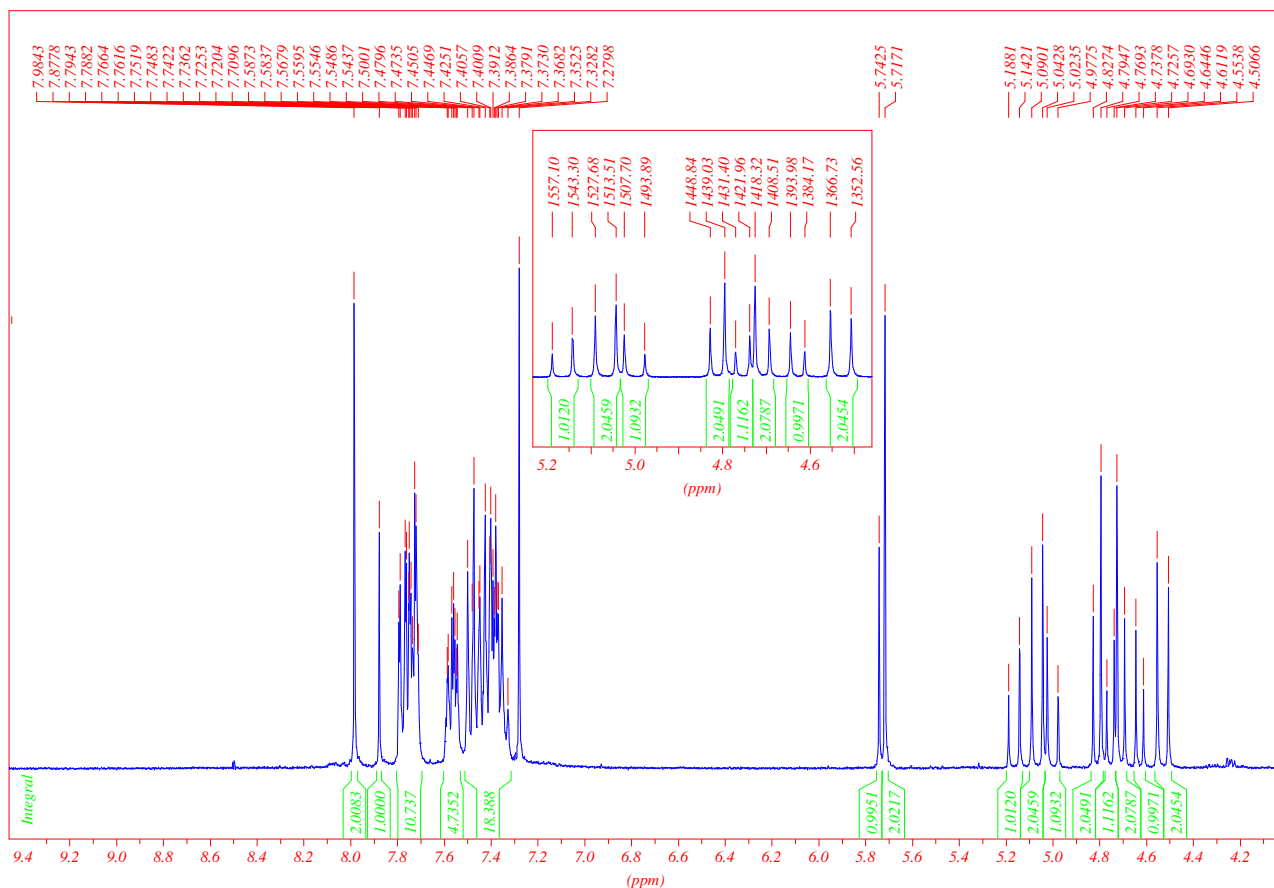

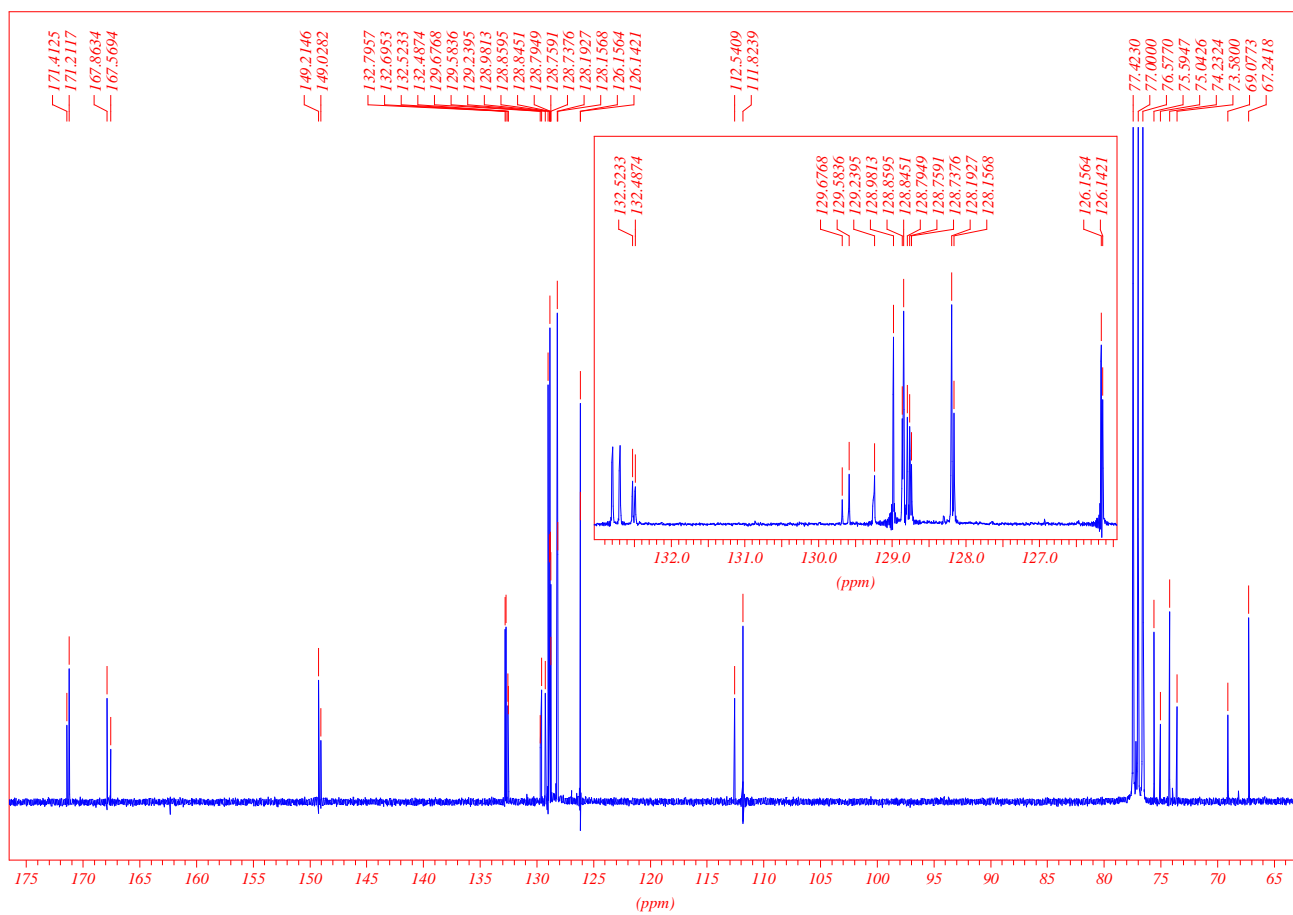

**(3a*RS*,6a*SR*)-6a-Hydroxy-2-(4-methoxyphenyl)-3a-[4-(4-methoxyphenyl)-1,2,3-triazol-2-yl]-6,6a-dihydro-3*H*-furo[3,4-*b*]pyrrol-4(3a*H*)-one (6c)**

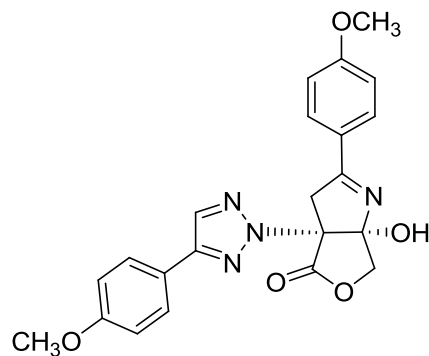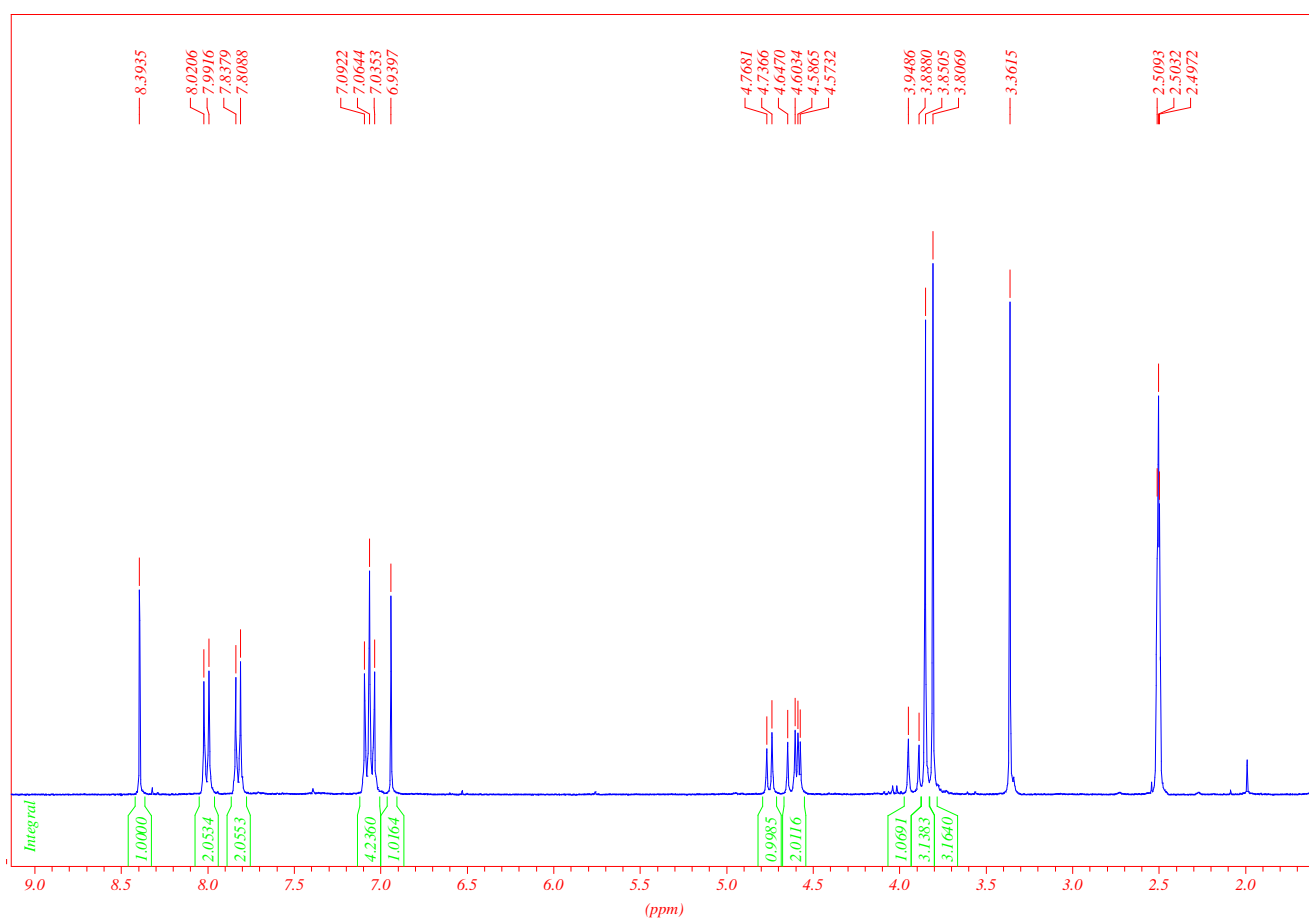



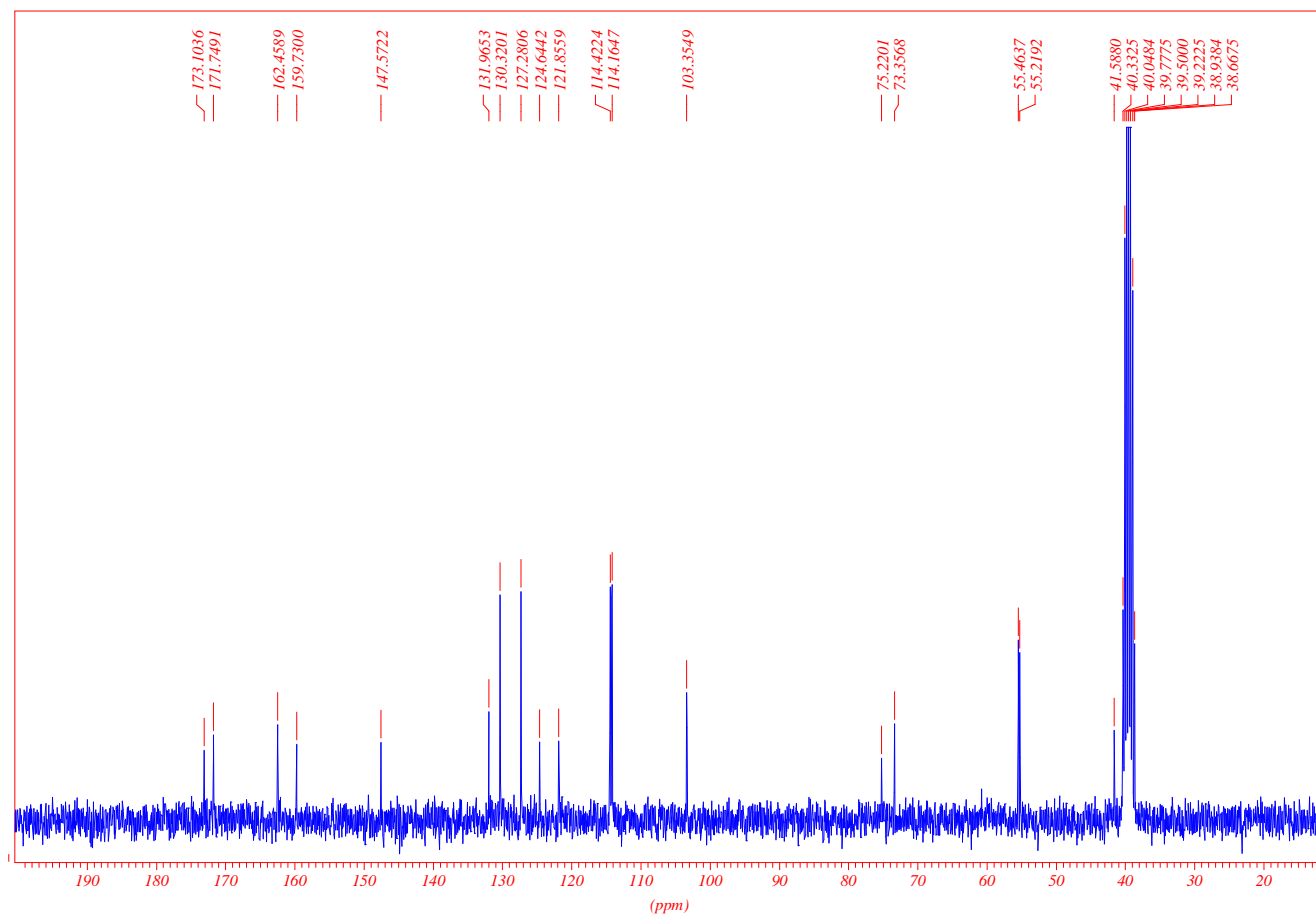

### 3-(4-Methoxyphenyl)-9-[(4-methoxyphenyl)-1,2,3-triazol-2-yl]-1,7-dioxaspiro[4.4]non-3-en-8-one (7c)

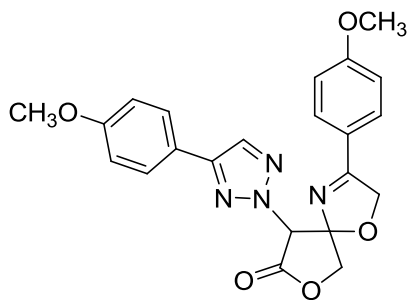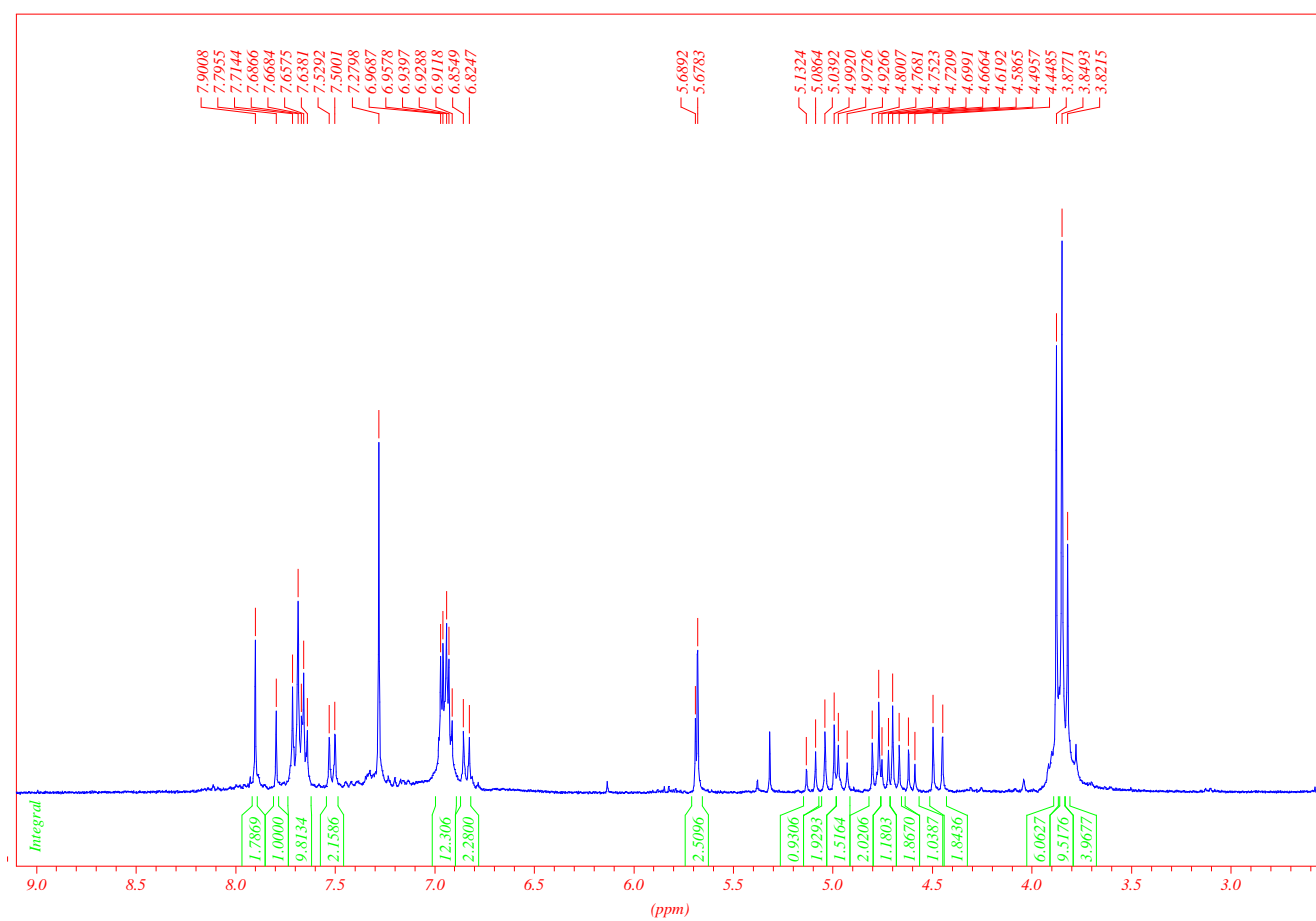

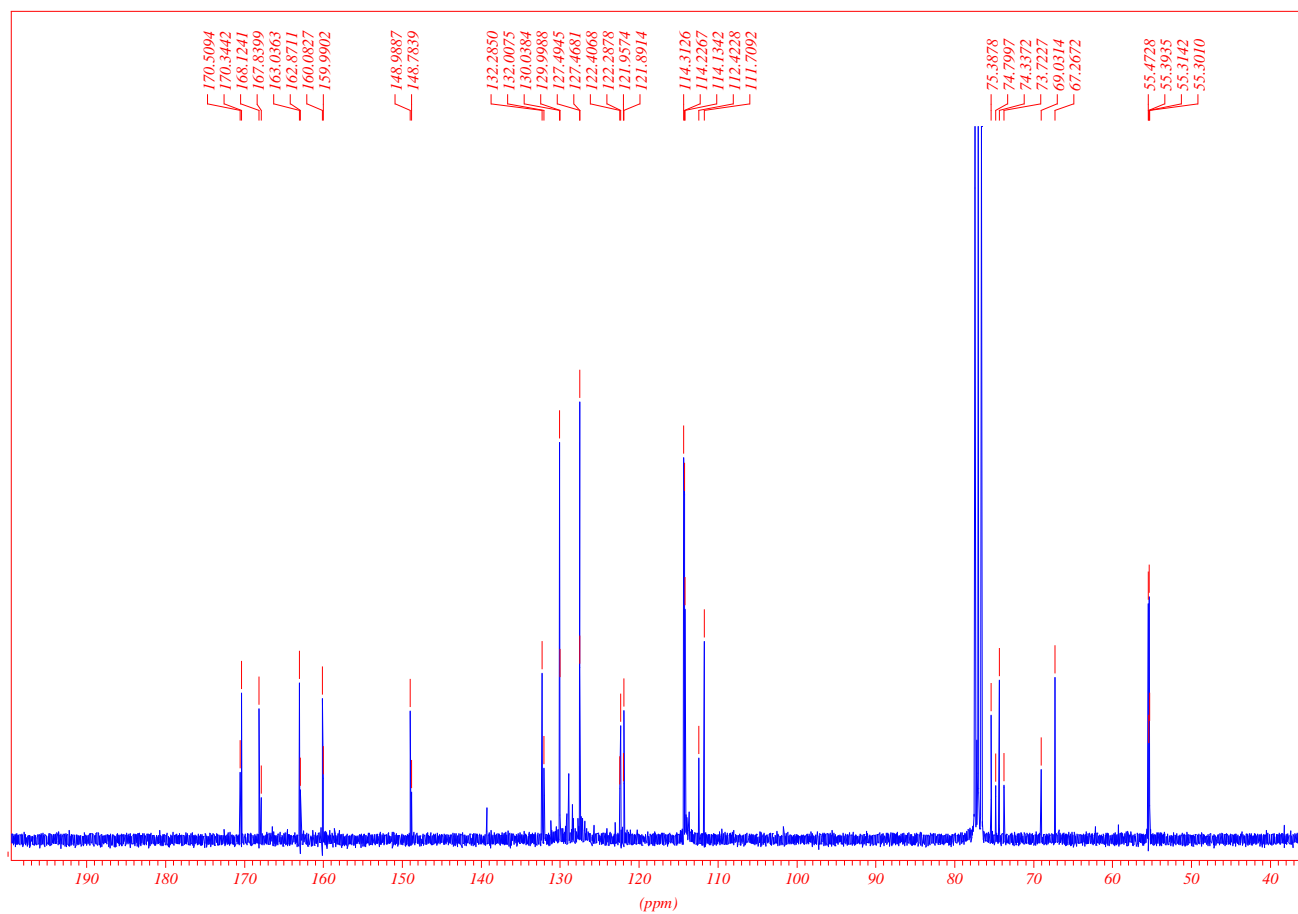

**(3a*RS*,6a*SR*)-2-(4-Bromophenyl)-3a-[4-(4-bromophenyl)-1,2,3-triazole-2-yl]-6a-hydroxy--6,6a-dihydro-3*H*-furo[3,4-*b*]pyrrol-4(3a*H*)-one (6d)**

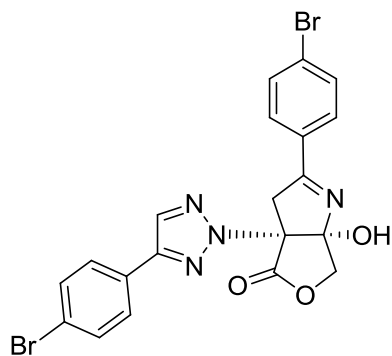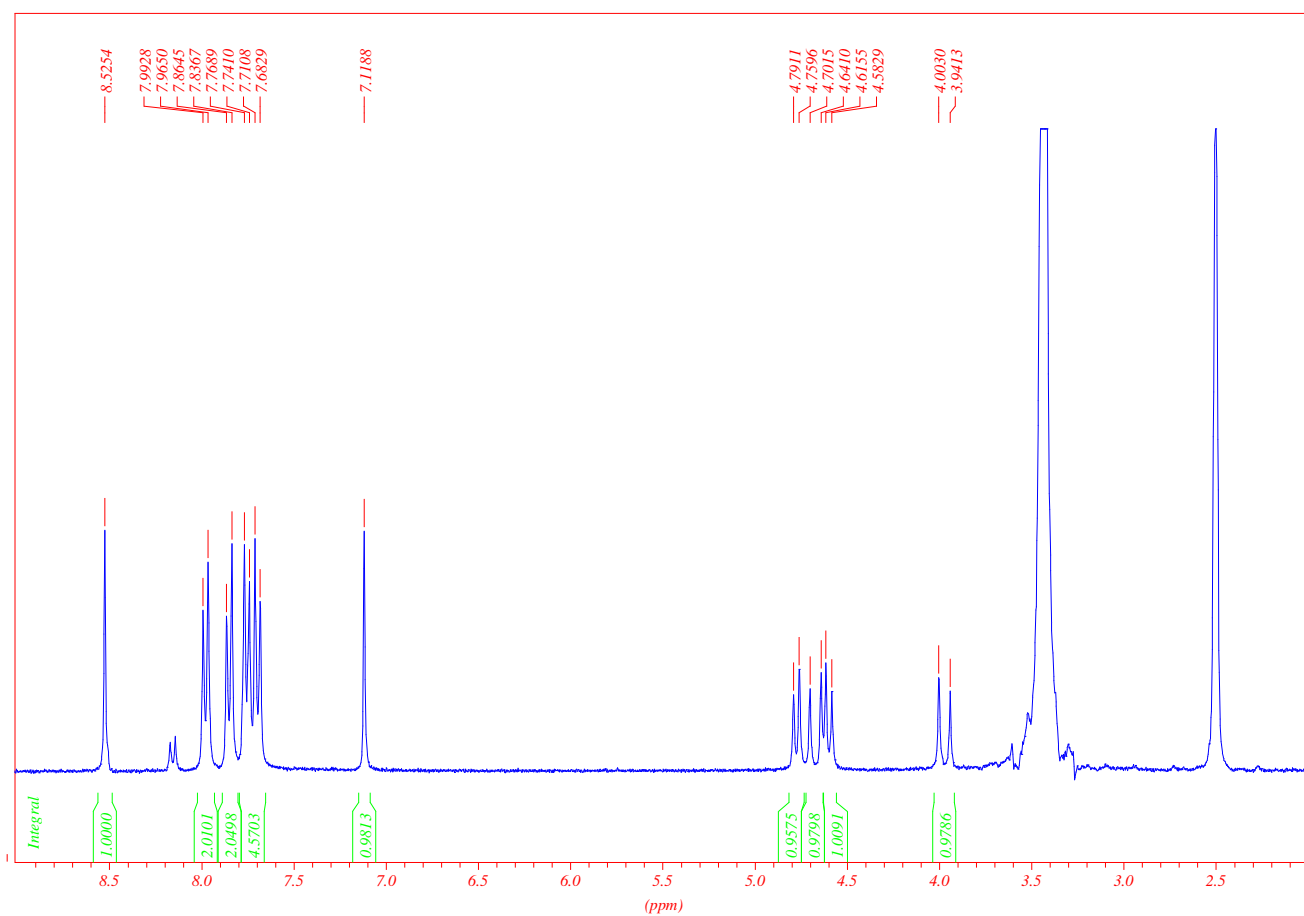

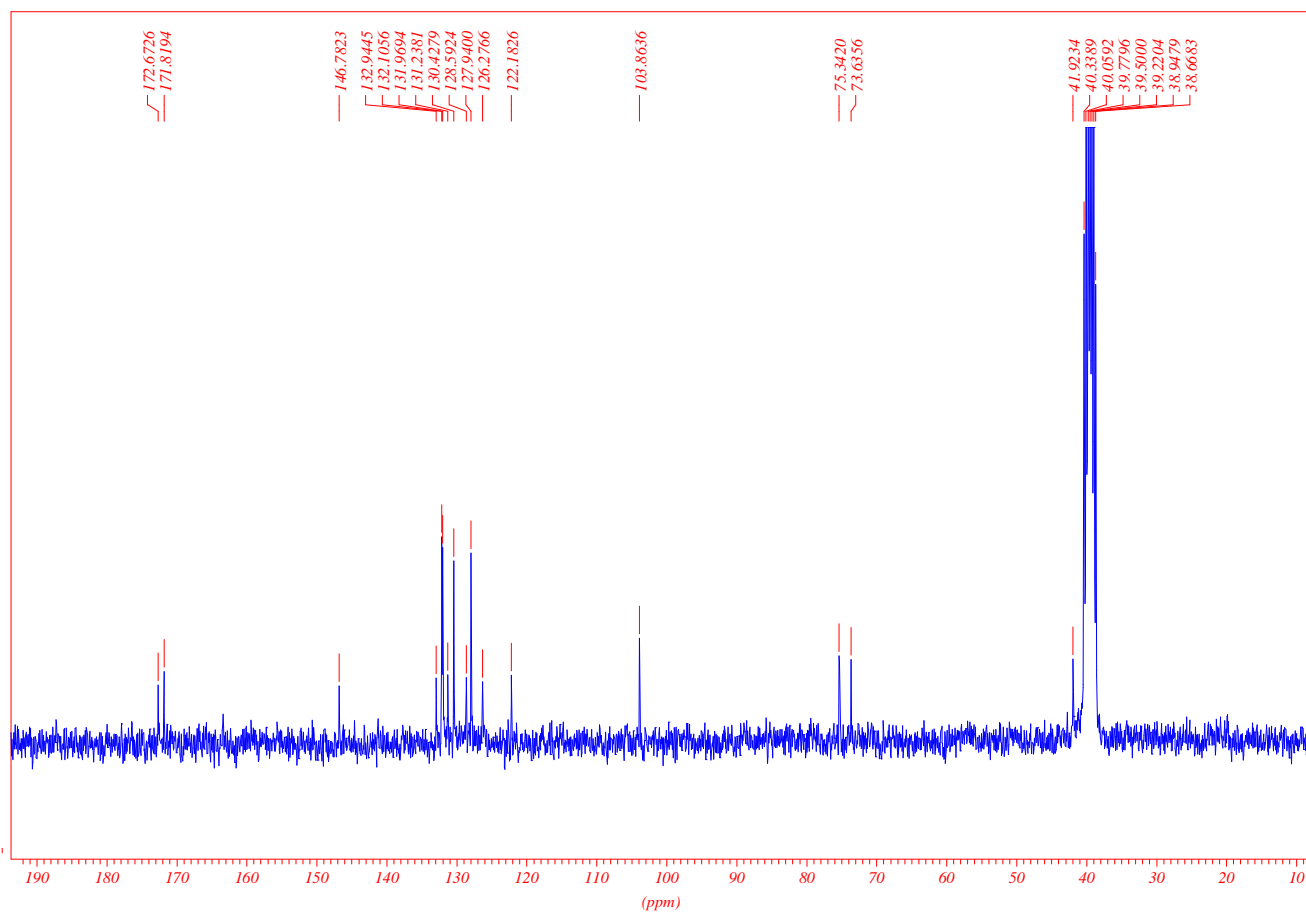

**3-(4-Bromophenyl)-9-[(4-bromophenyl)-1,2,3-triazol-2-yl]-1,7-dioxo-4-azaspiro[4.4]non-3-en-8-one  
(7d)**

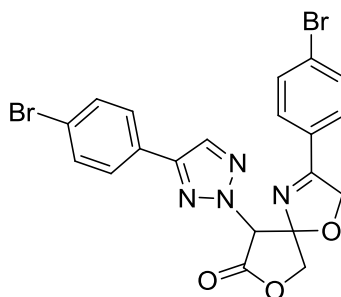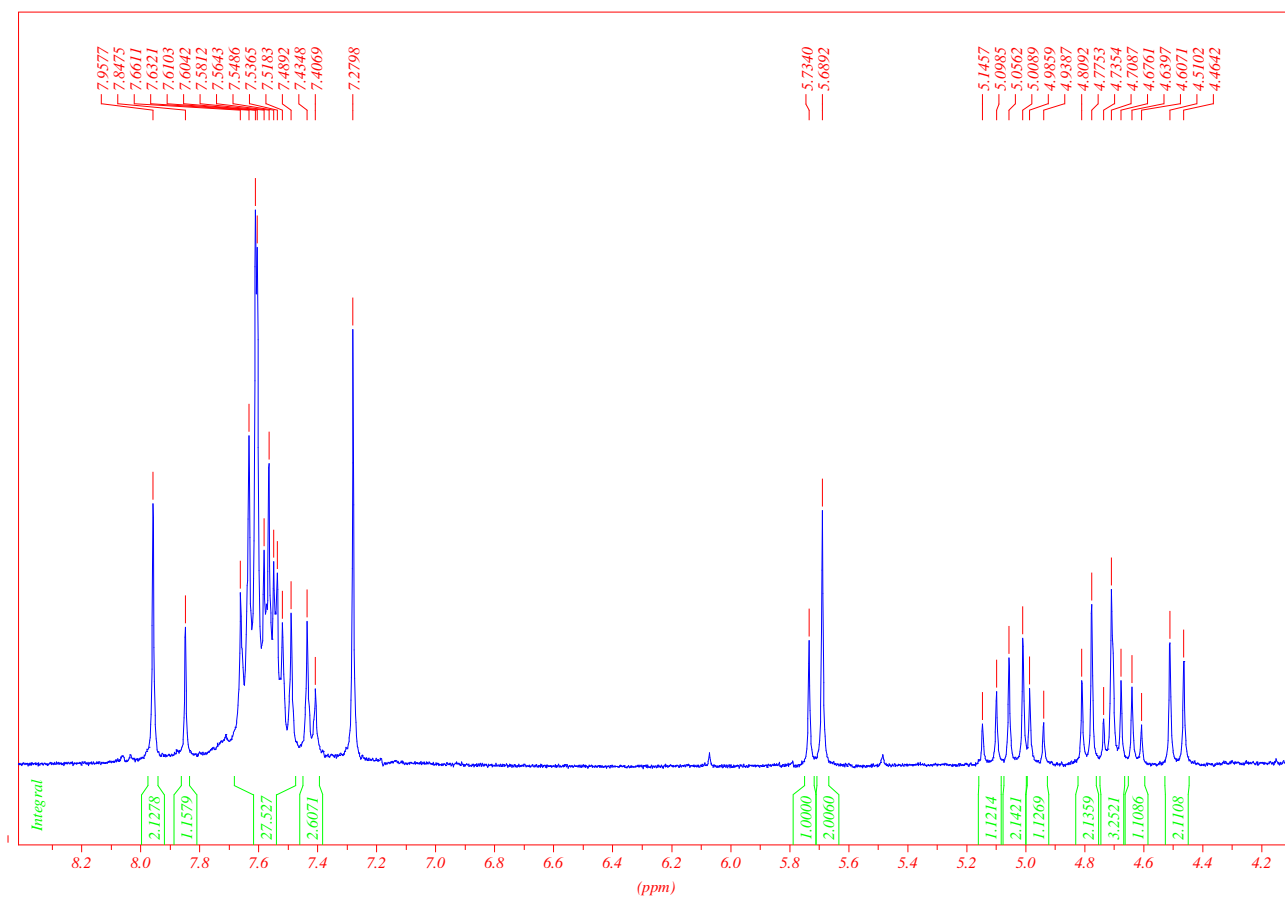

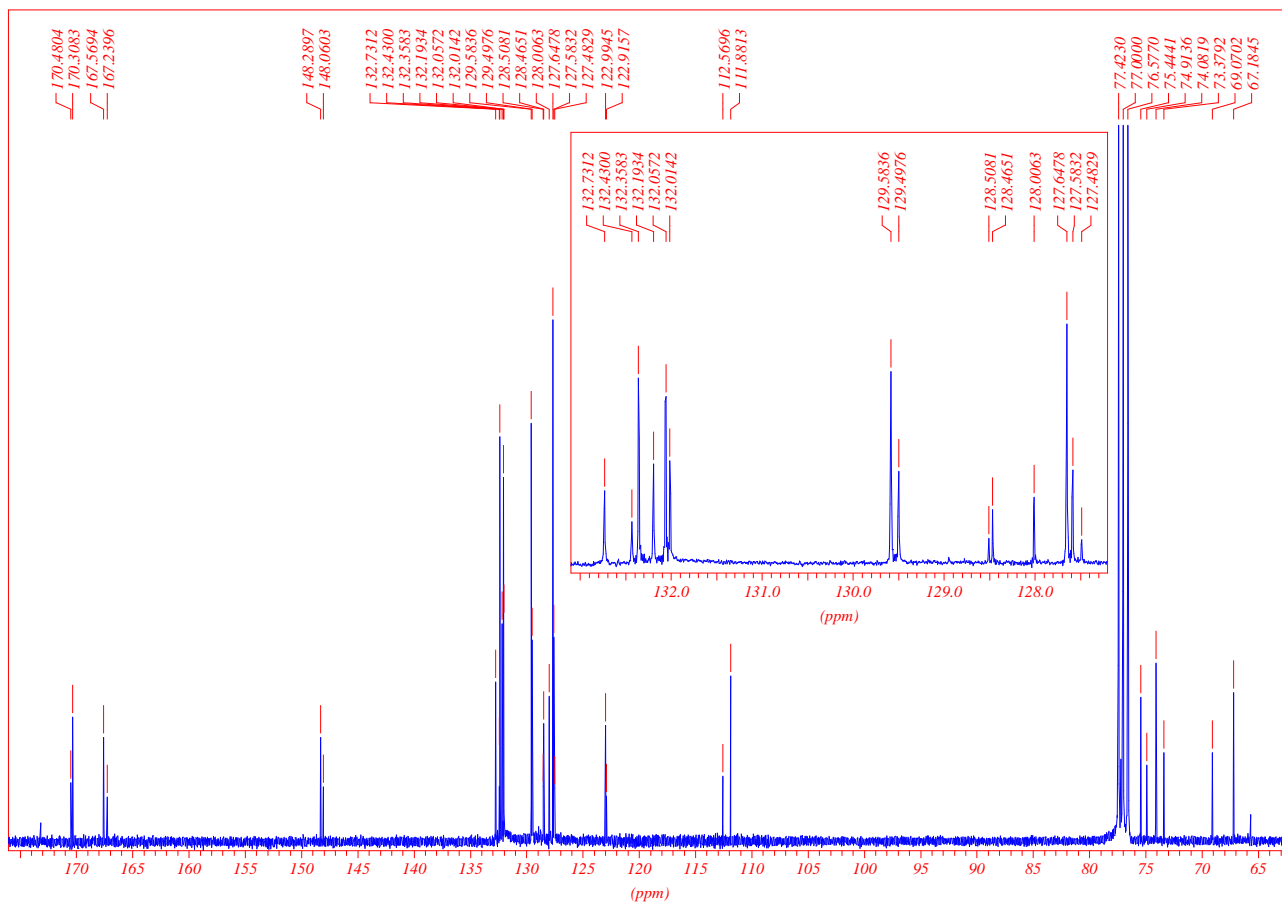

**(3*aRS*,6*aSR*)-5-Acetyl-6*a*-hydroxy-2-(4-methylphenyl)-3*a*-(4-methoxyphenyl)-3,5,6,6*a*-tetrahydropyrrolo[3,4-*b*]pyrrol-4(3*H*)-one (12)**

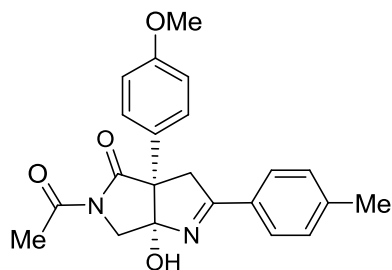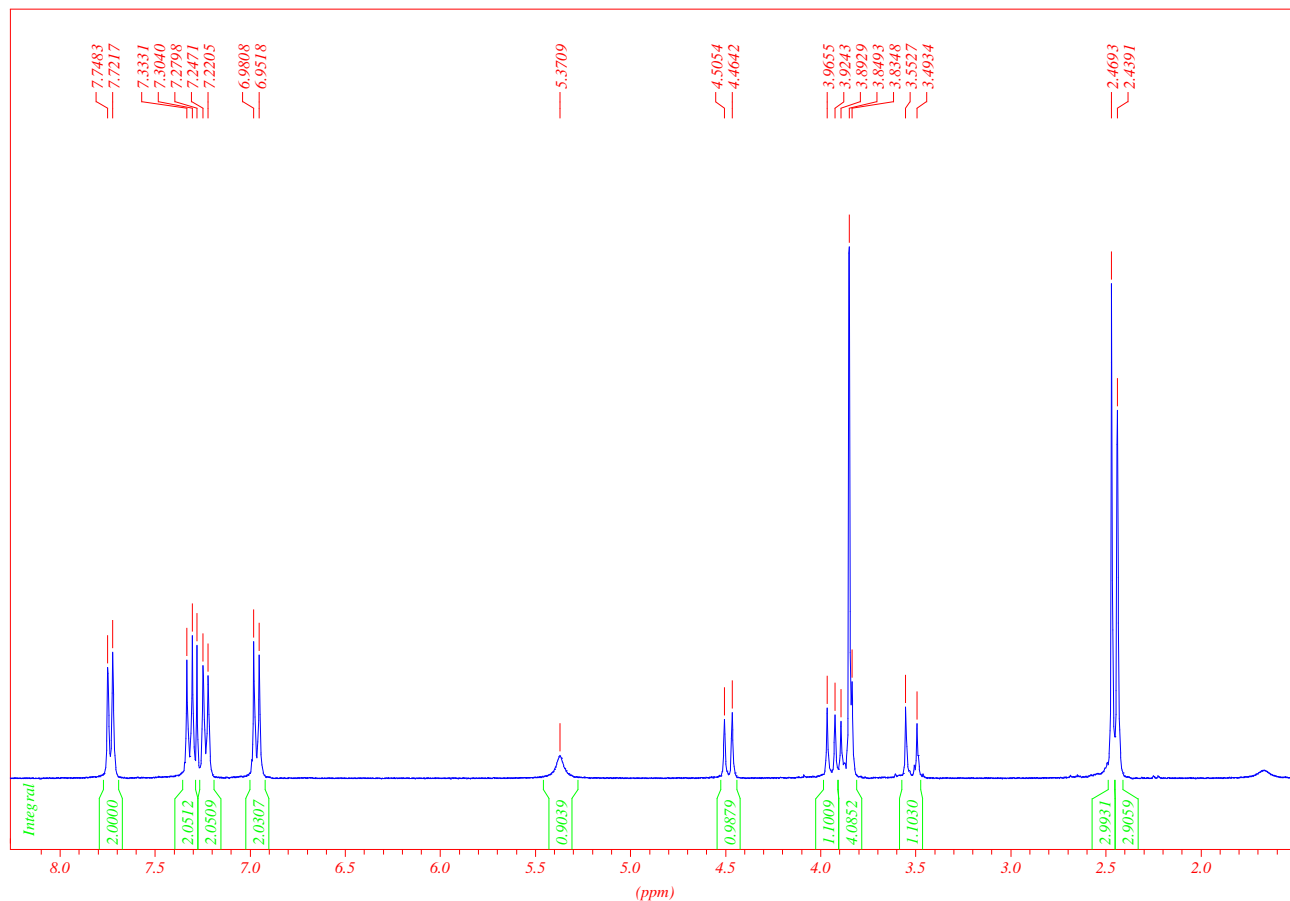



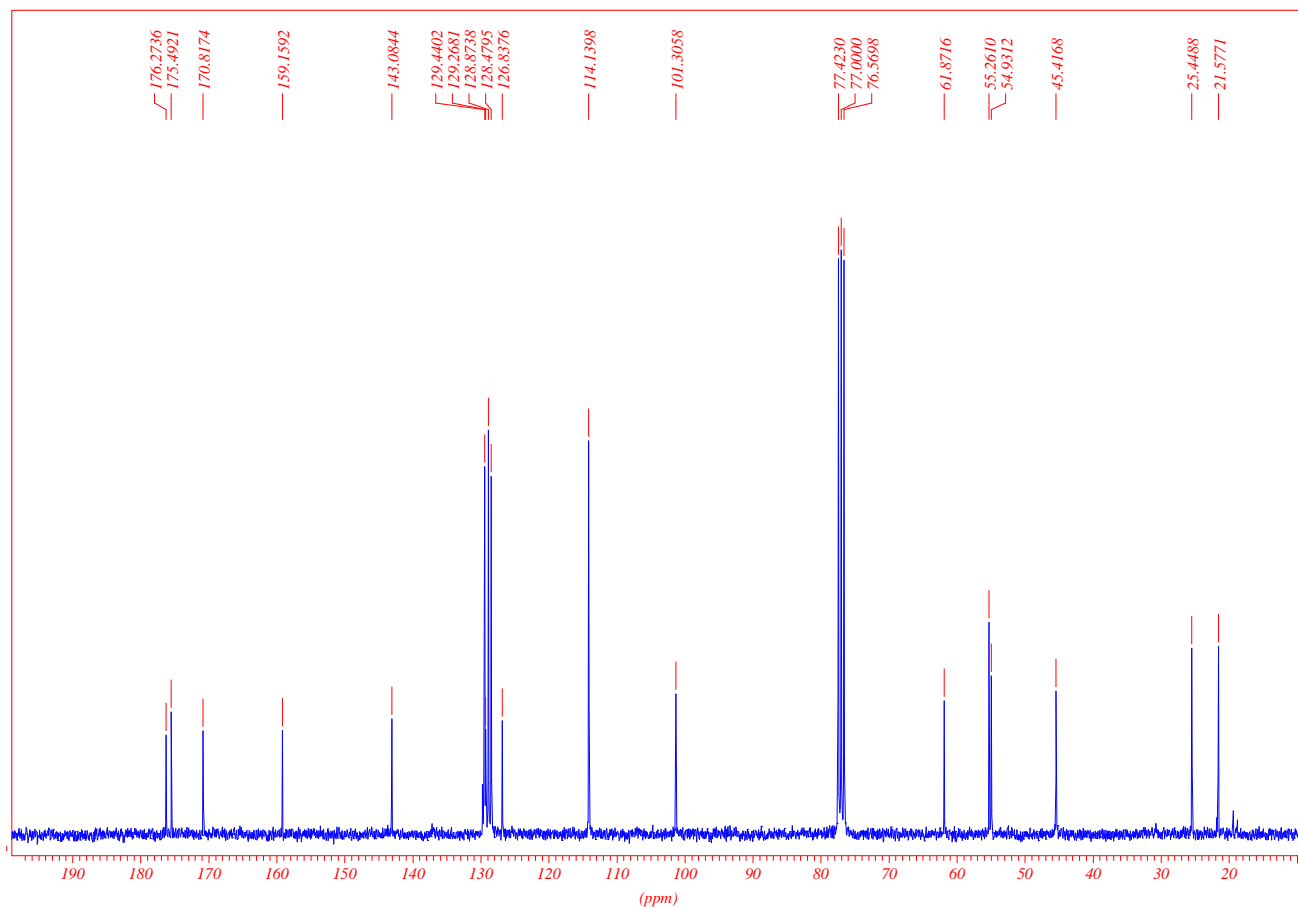

## References

- 1 G. Lowe, H.W. Yeung, *J. Chem. Soc., Perkin Trans. 1* 1973, 2907–2910.
- 2 H.-D. Stachel, K. Zeitler, S. Dick, *Liebigs Ann.* 1996, 103–107.
